# Supplementary material for: Cuprizone-induced demyelination and demyelination-associated inflammation result in different proton magnetic resonance metabolite spectra
Source: PubMed Central journal article supplement — NMR Biomed. 2015 Mar 19;28(4):505–13. doi: 10.1002/nbm.3277 (PMC4403969; doi:10.1002/nbm.3277), 2015-03-19

# Supplementary file S3

High resolution images  
(scalebar = 100 $\mu$ m)

CX<sub>3</sub>CR1<sup>+/+</sup> - TOPRO3

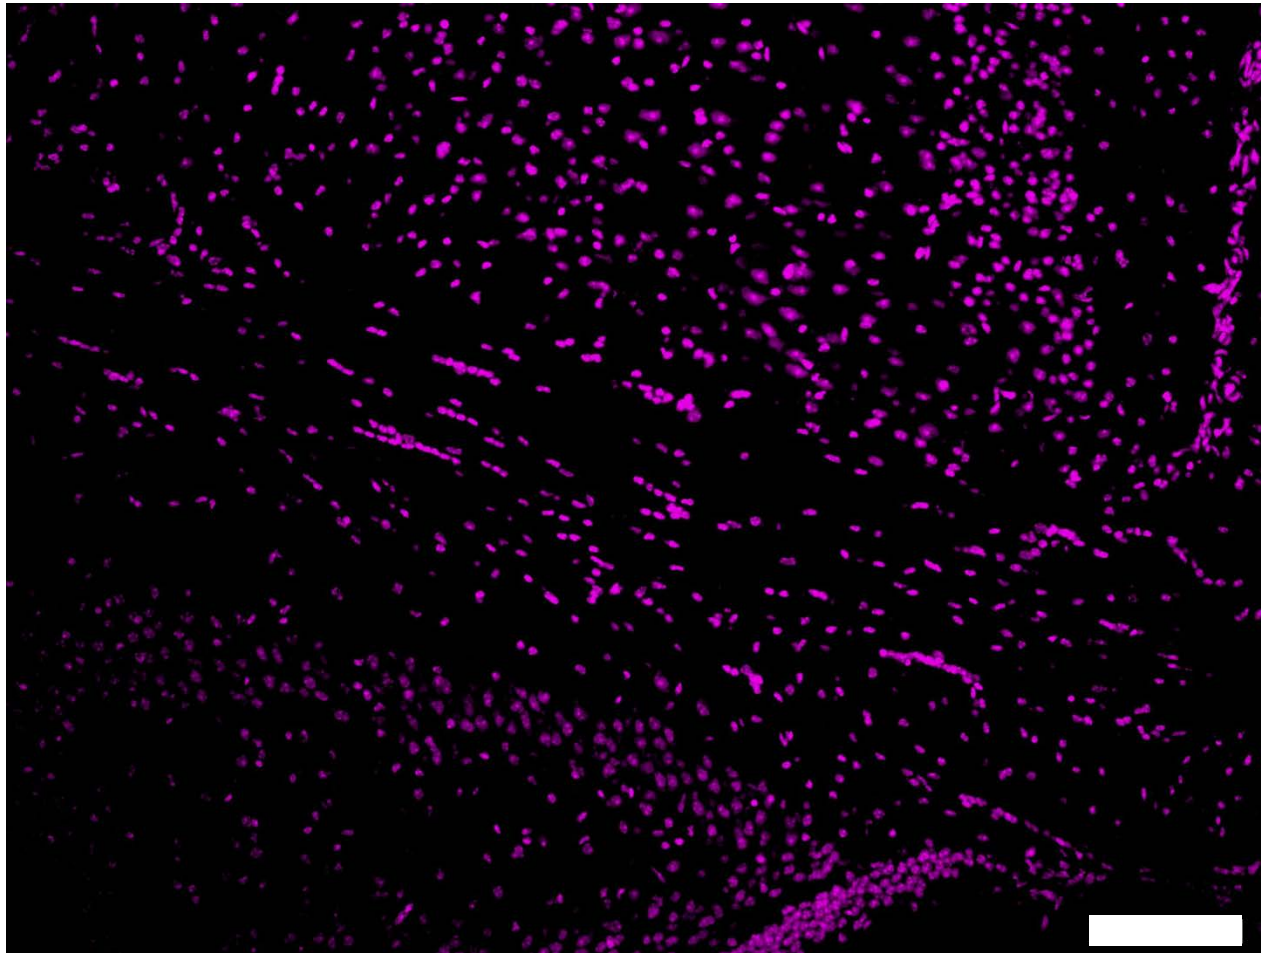

CX<sub>3</sub>CR1<sup>+/+</sup> - IBA1/CC1

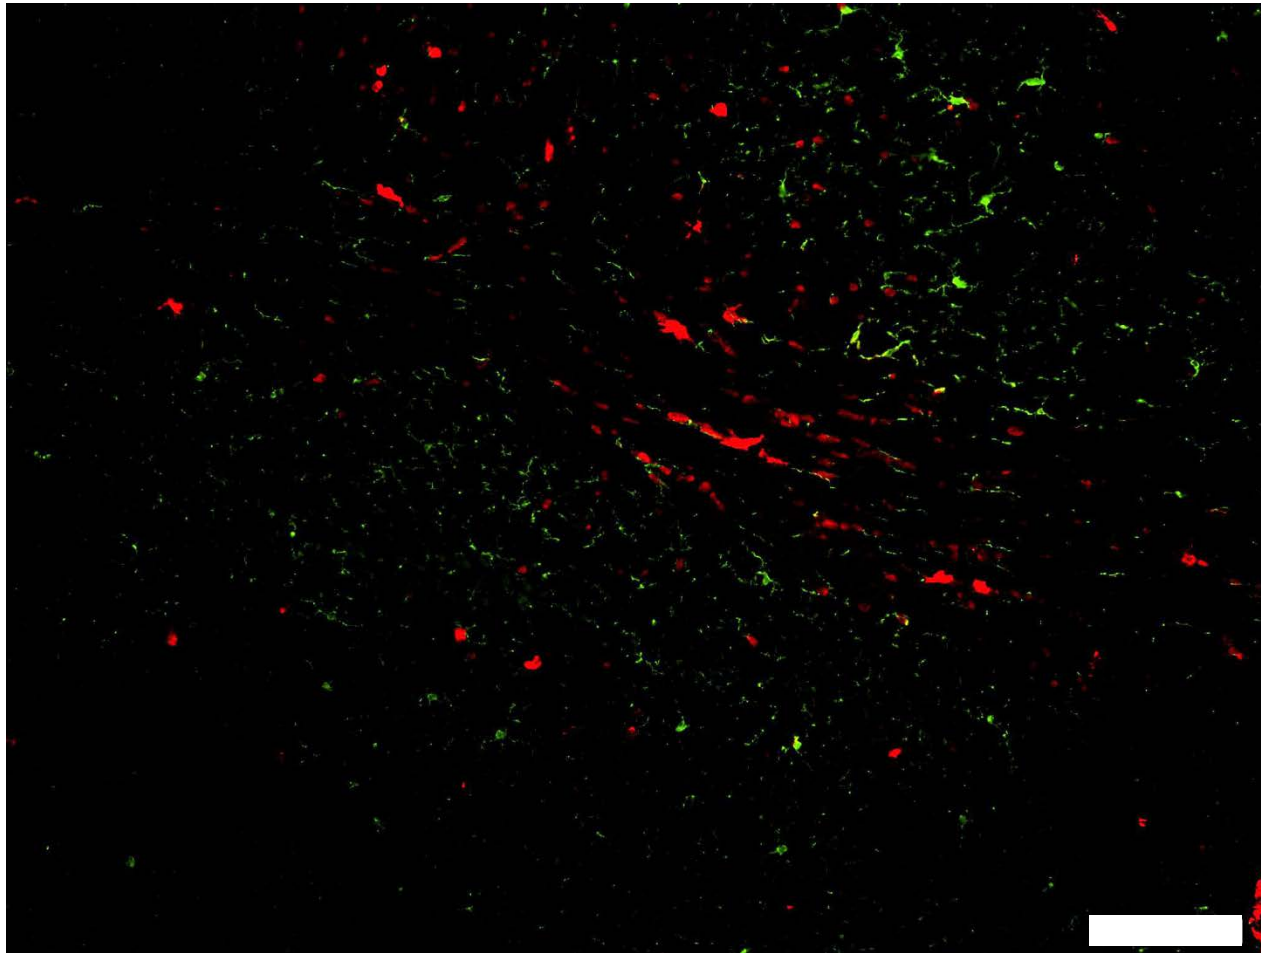

CX<sub>3</sub>CR1<sup>+/+</sup> - MBP

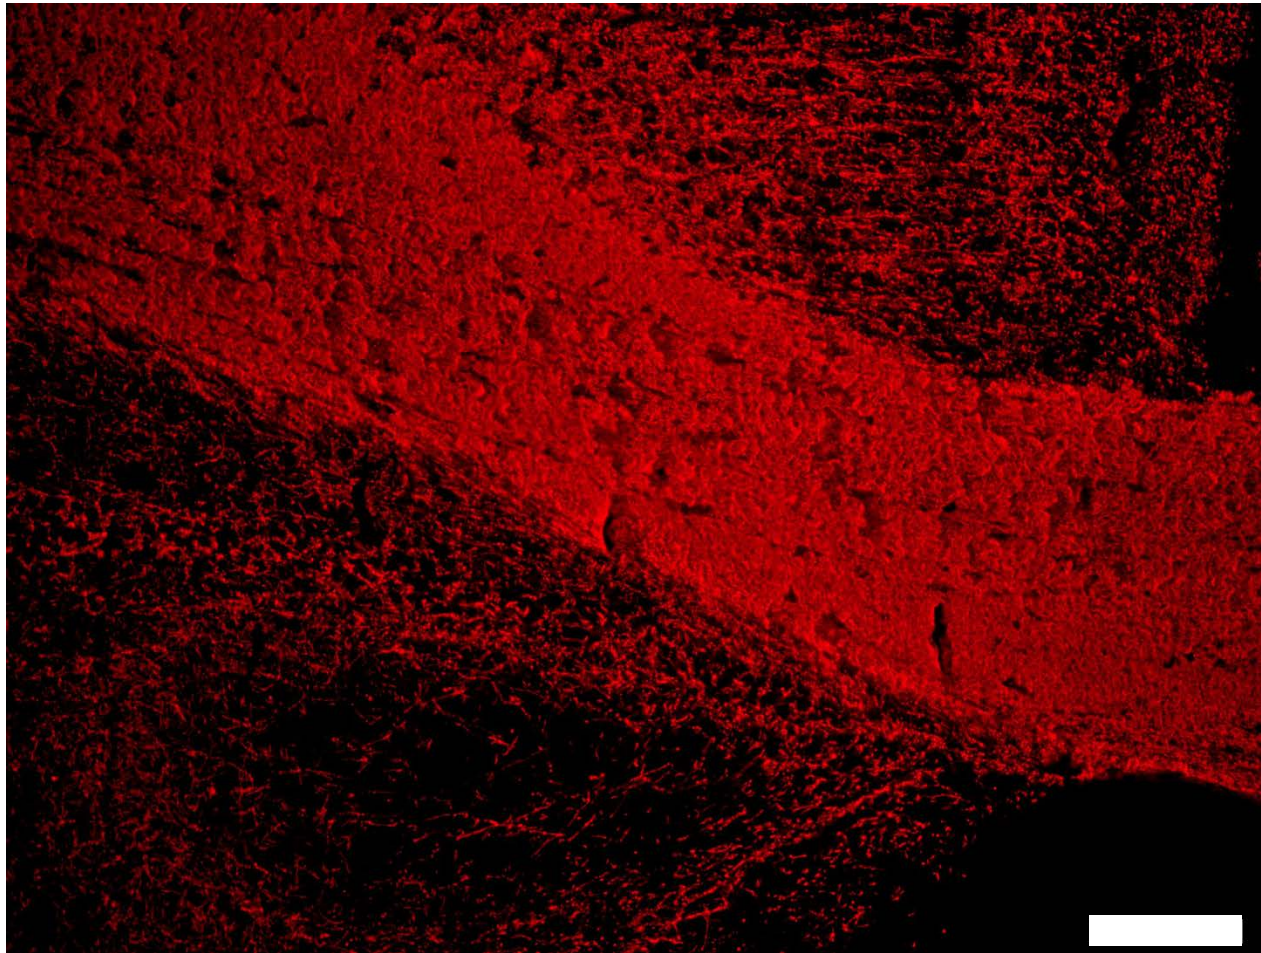

CX<sub>3</sub>CR1<sup>+/+</sup> - S100 $\beta$ /GFAP

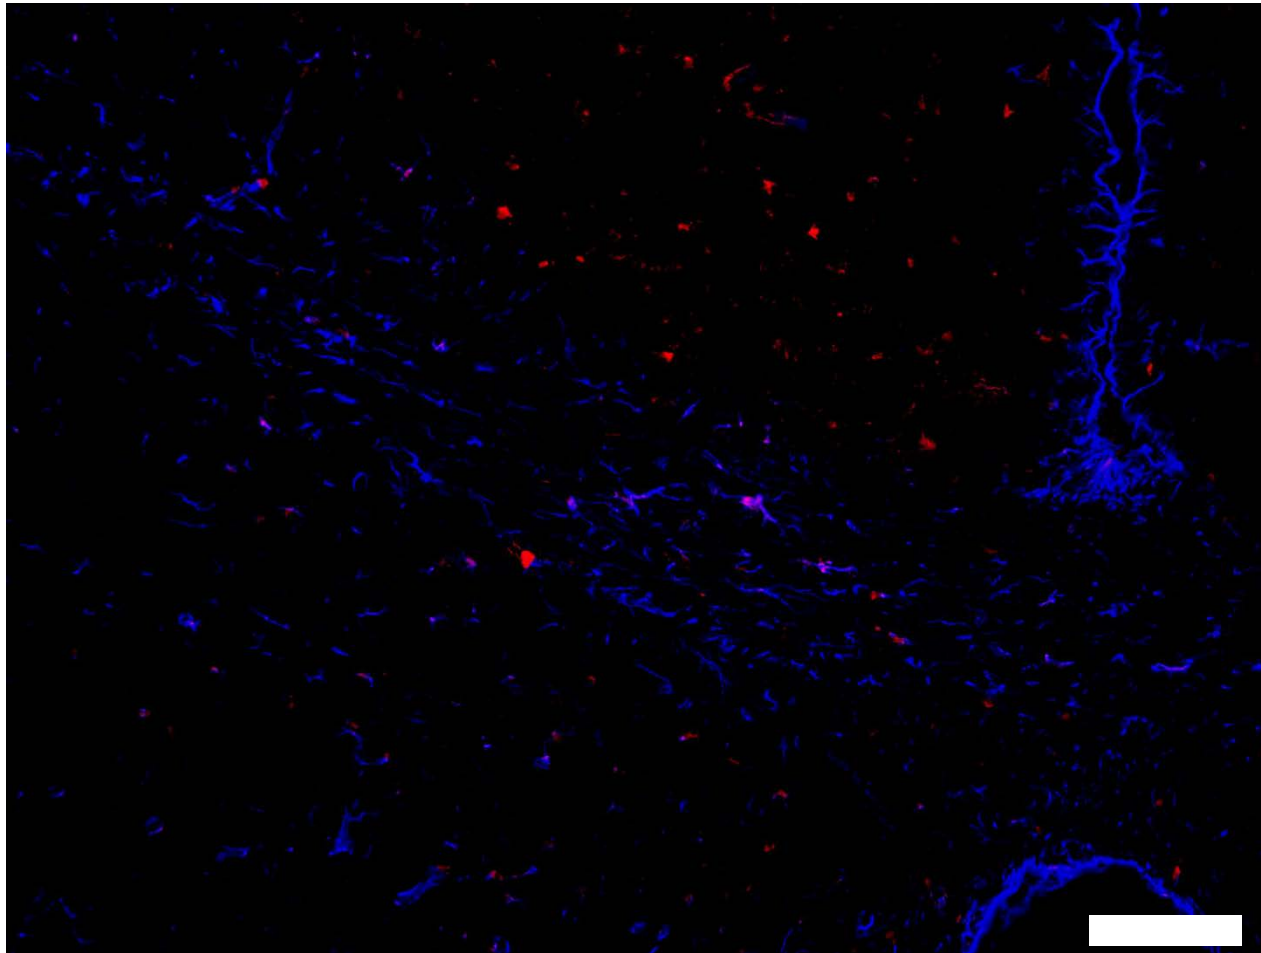

CPZ CX<sub>3</sub>CR1<sup>+/+</sup> - TOPRO3

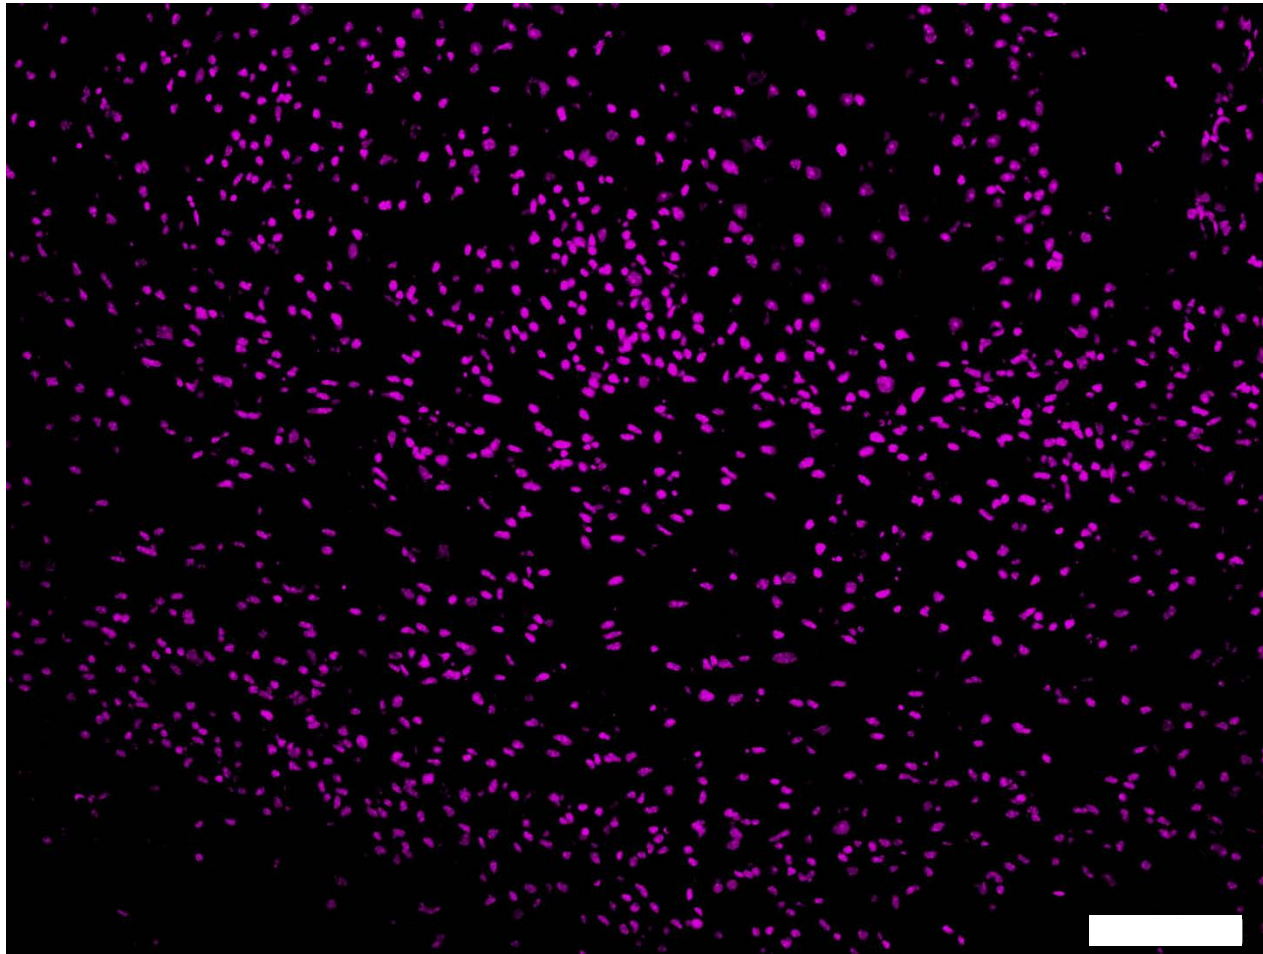

CPZ CX<sub>3</sub>CR1<sup>+/+</sup> - IBA1/CC1

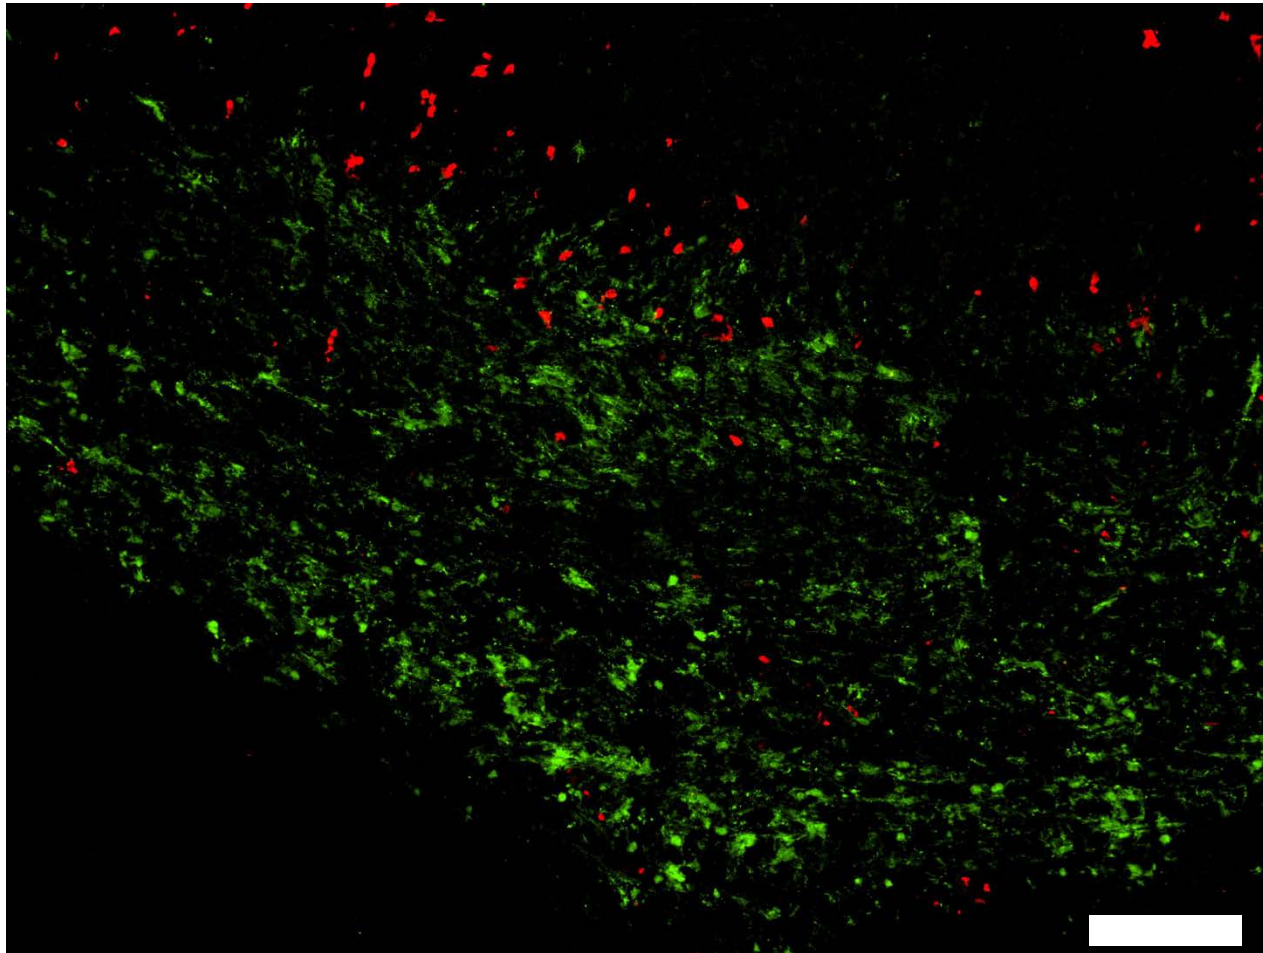

CPZ CX<sub>3</sub>CR1<sup>+/+</sup> - MBP

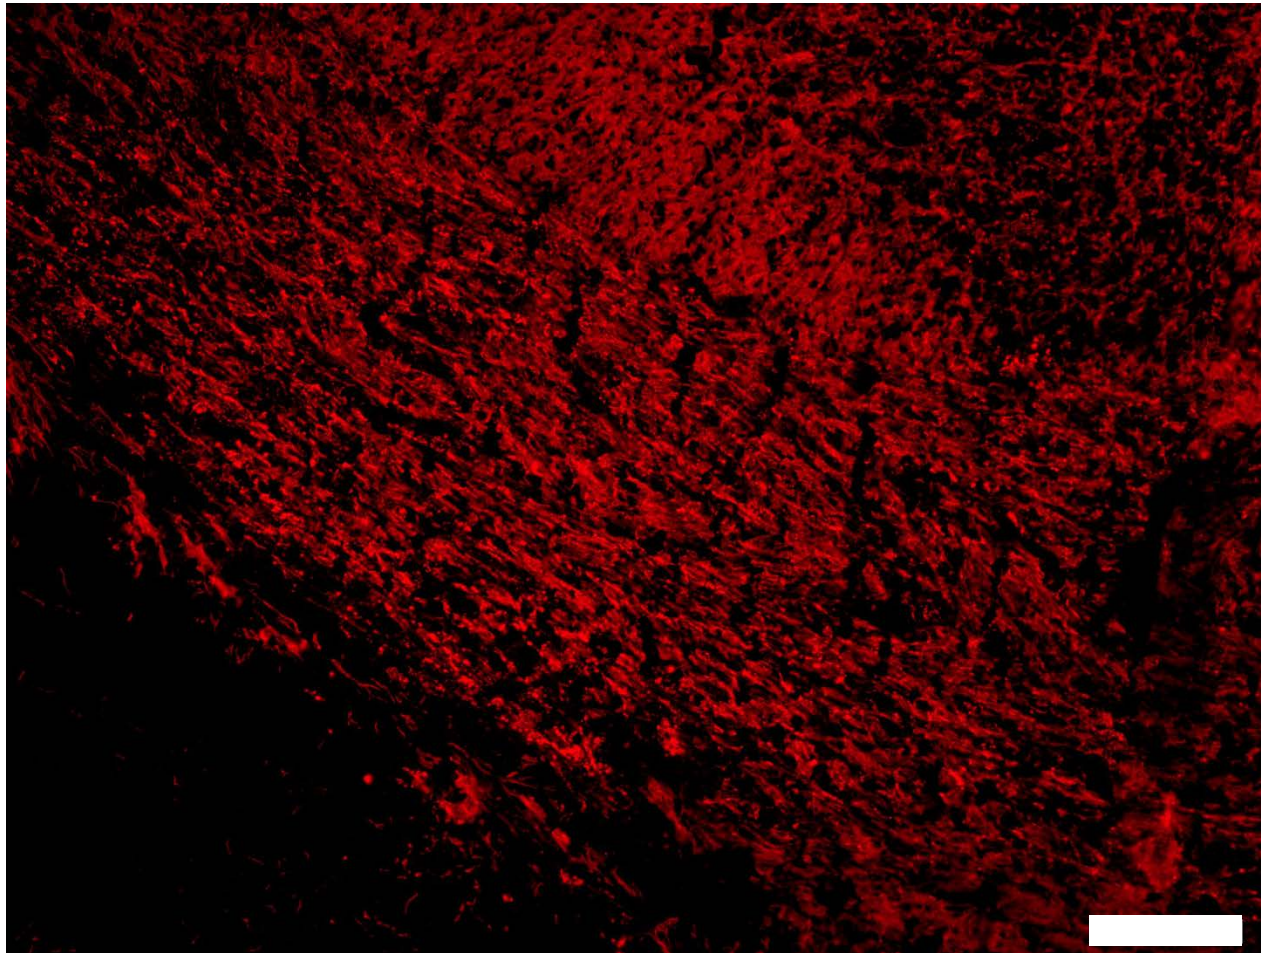



CPZ CX<sub>3</sub>CR1<sup>+/+</sup> - S100 $\beta$ /GFAP

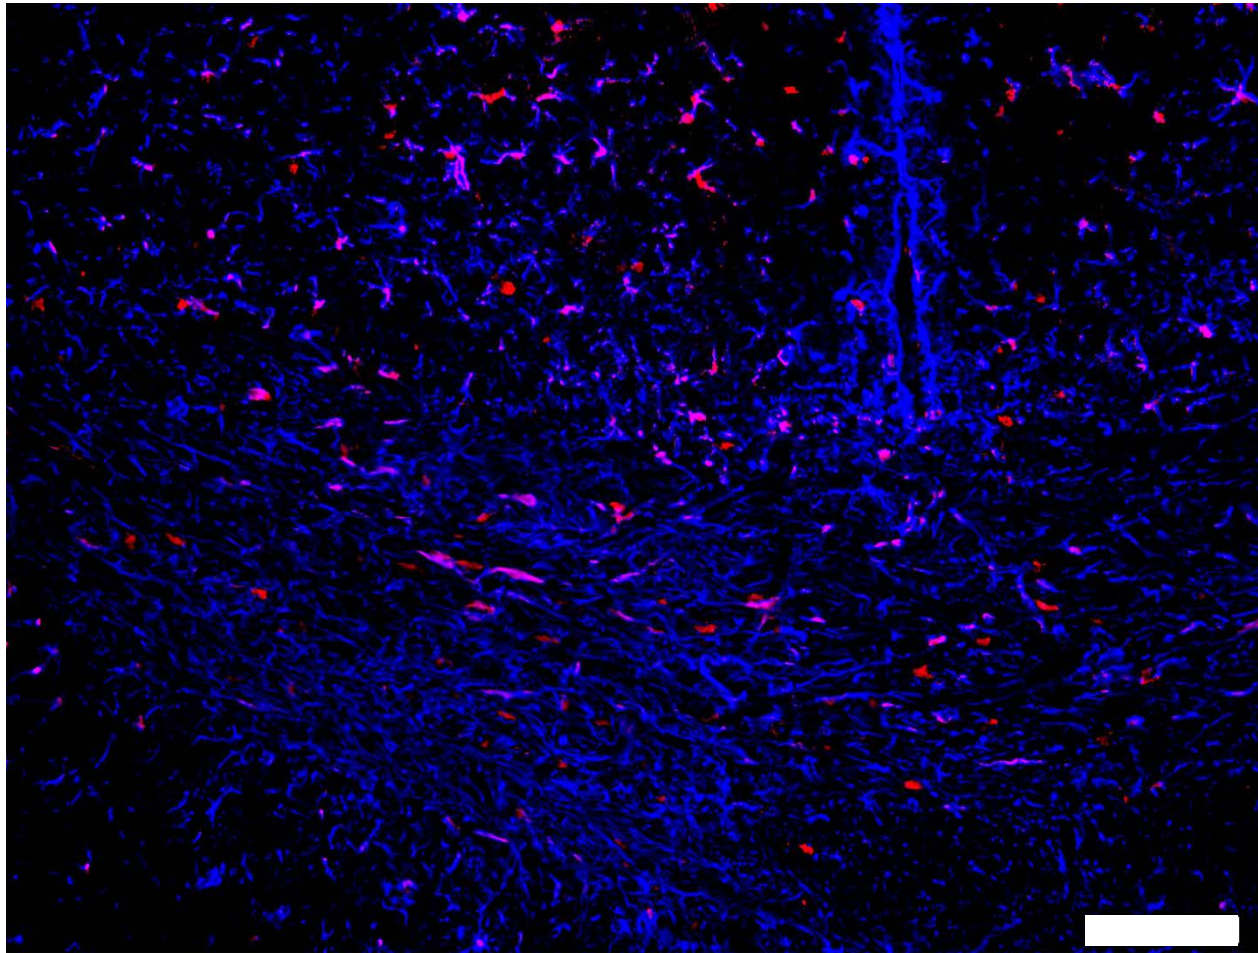

CX<sub>3</sub>CR1<sup>+/-</sup> - TOPRO3

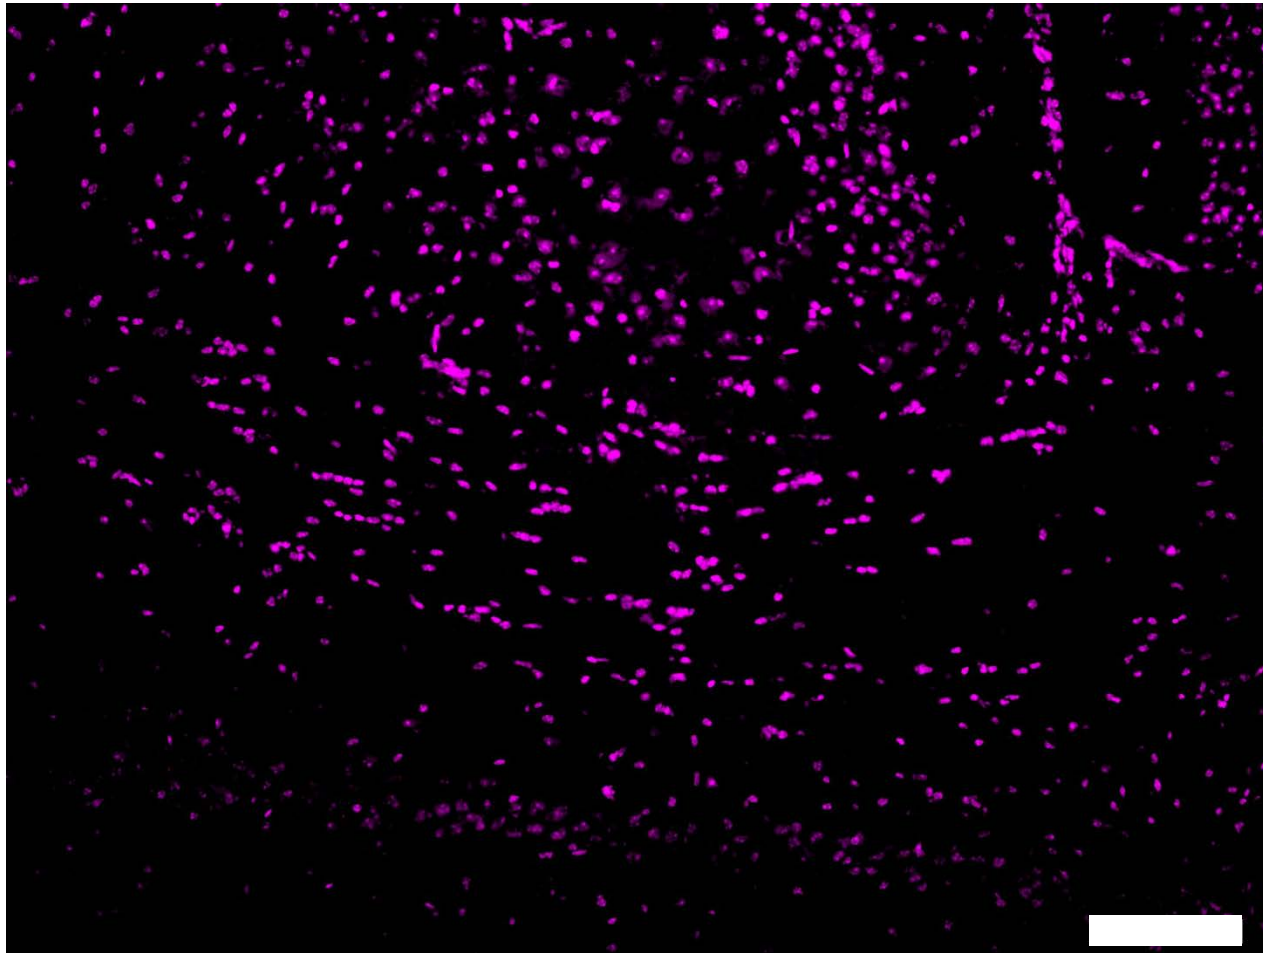

CX<sub>3</sub>CR1<sup>+/-</sup> - IBA1/CC1

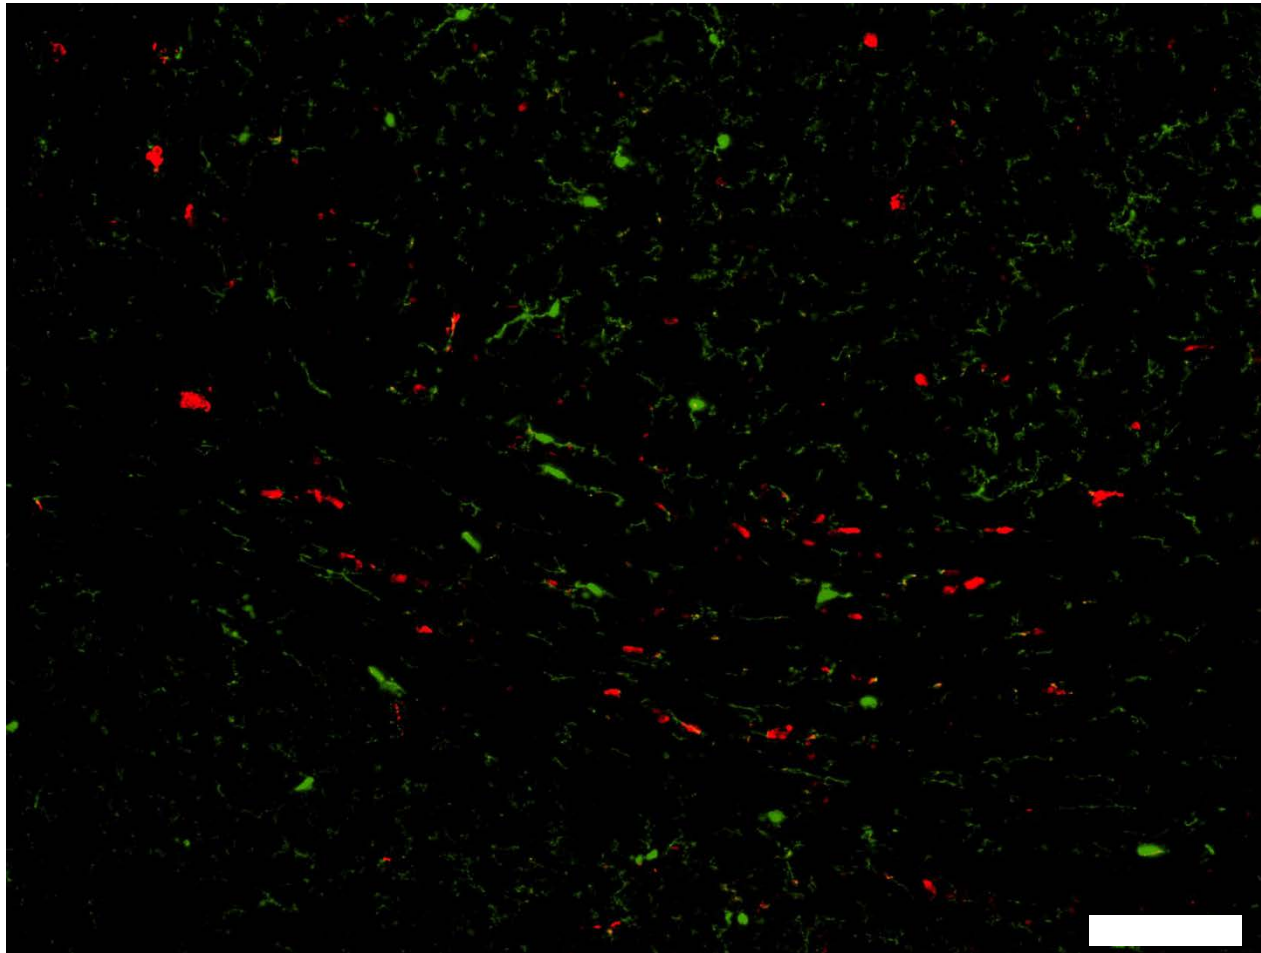

$CX_3CR1^{+/-}$  - MBP

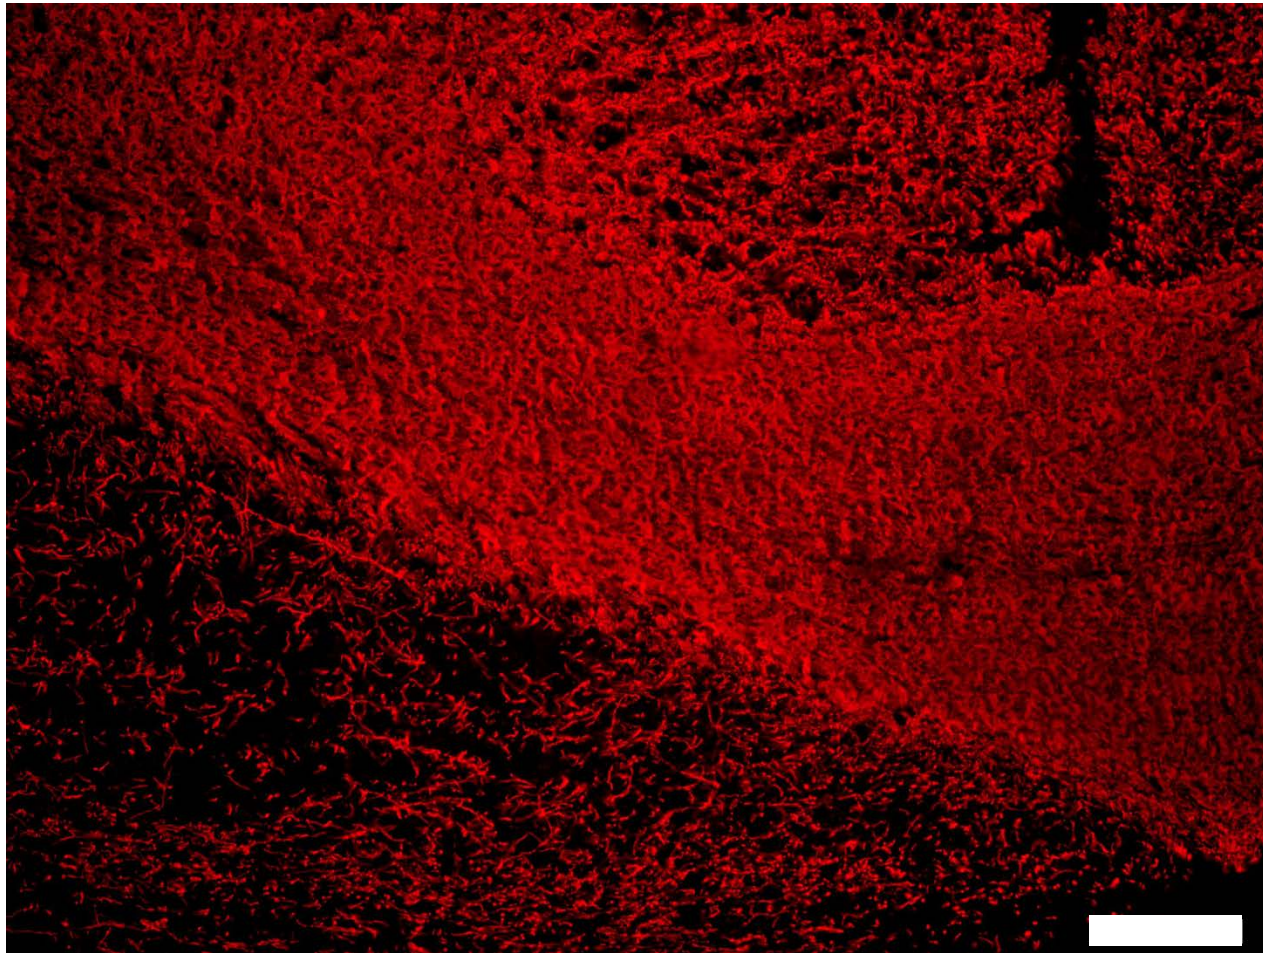

CX<sub>3</sub>CR1<sup>+/-</sup> - S100 $\beta$ /GFAP

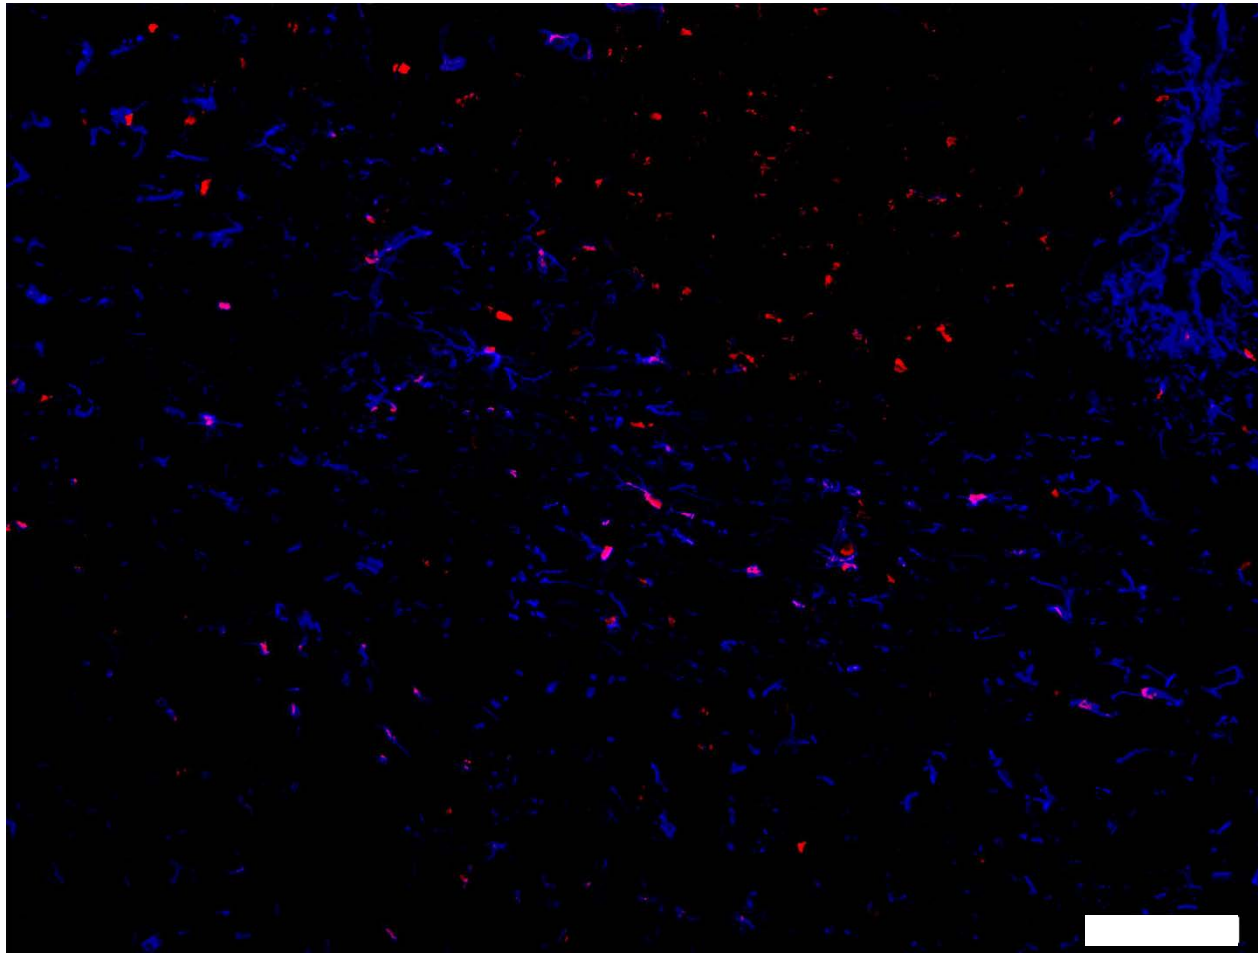

CPZ CX<sub>3</sub>CR1<sup>+/-</sup> - TOPRO3

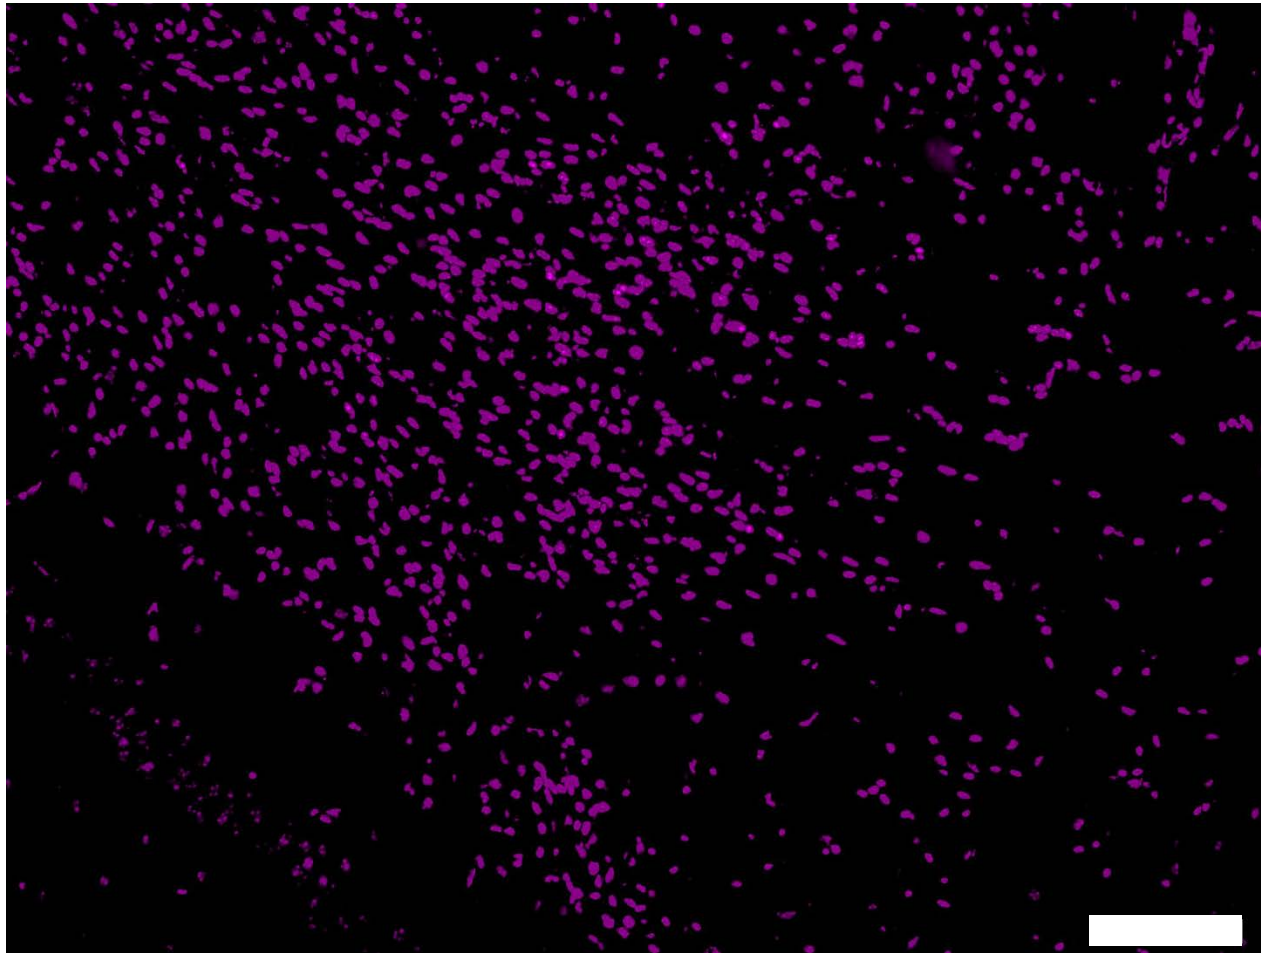

CPZ CX<sub>3</sub>CR1<sup>+/-</sup> - IBA1/CC1

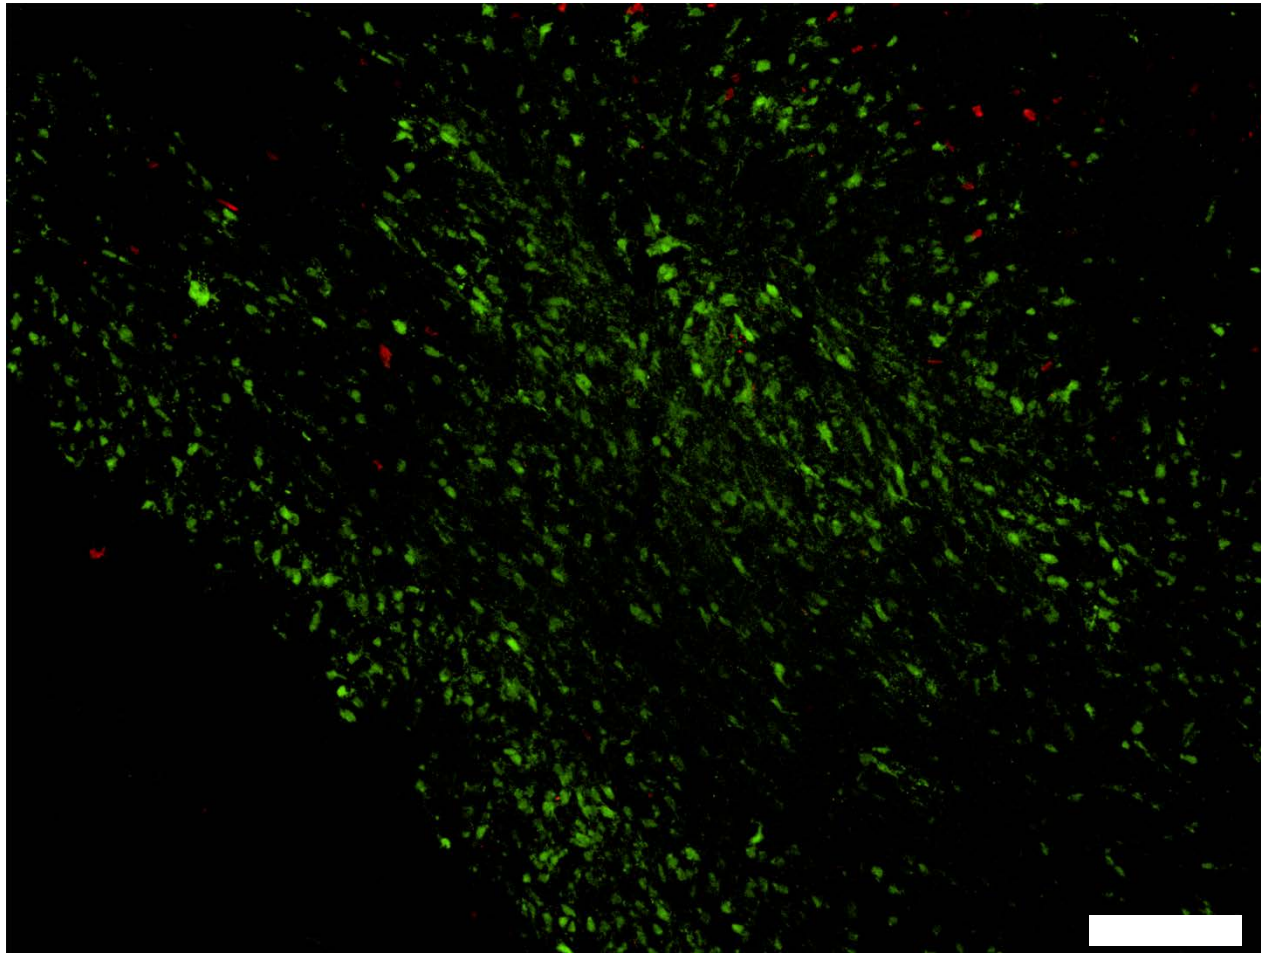

CPZ CX<sub>3</sub>CR1<sup>+/-</sup> - MBP

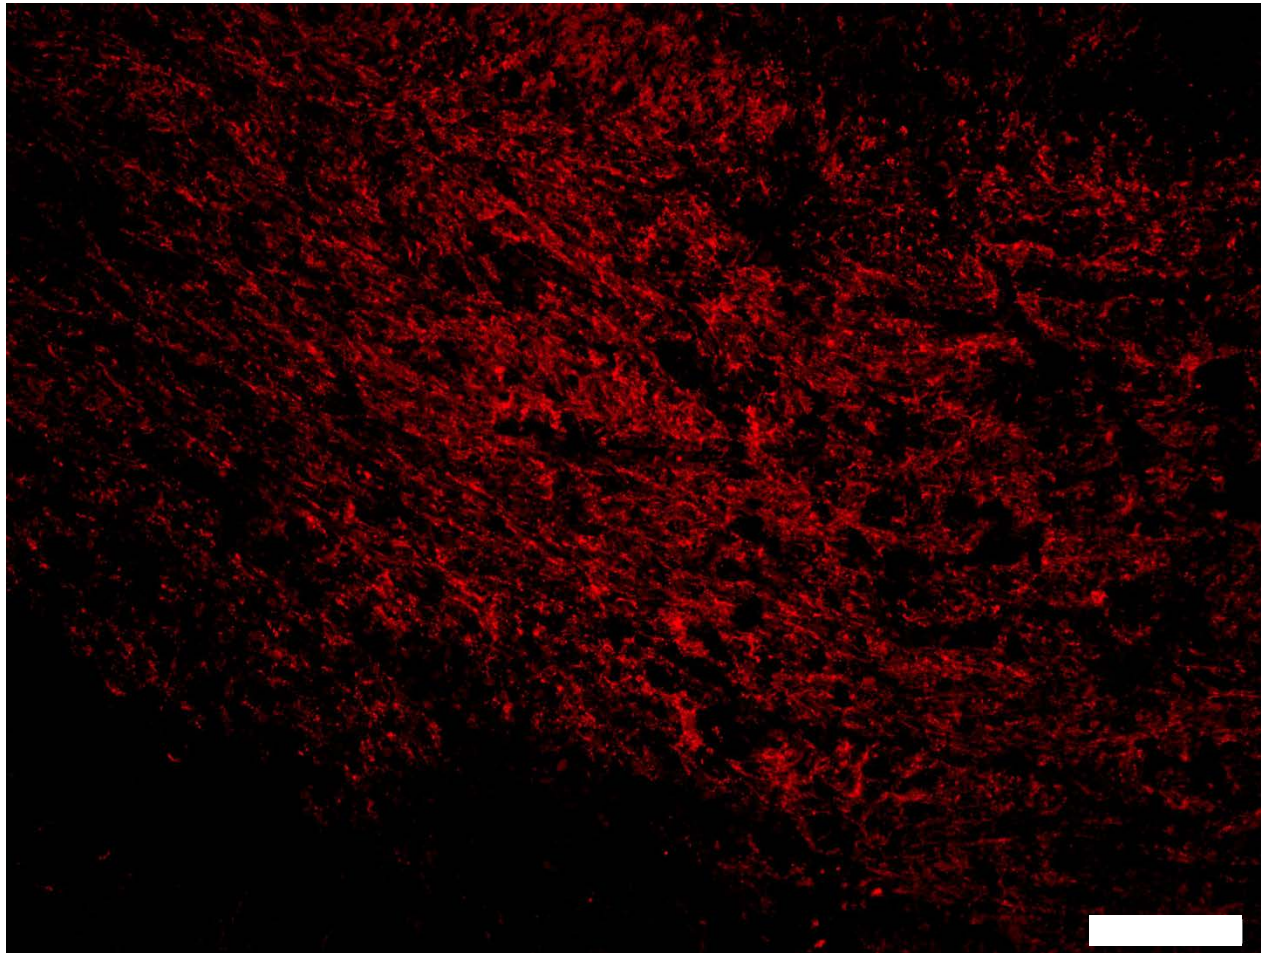



CPZ CX<sub>3</sub>CR1<sup>+/-</sup> - S100 $\beta$ /GFAP

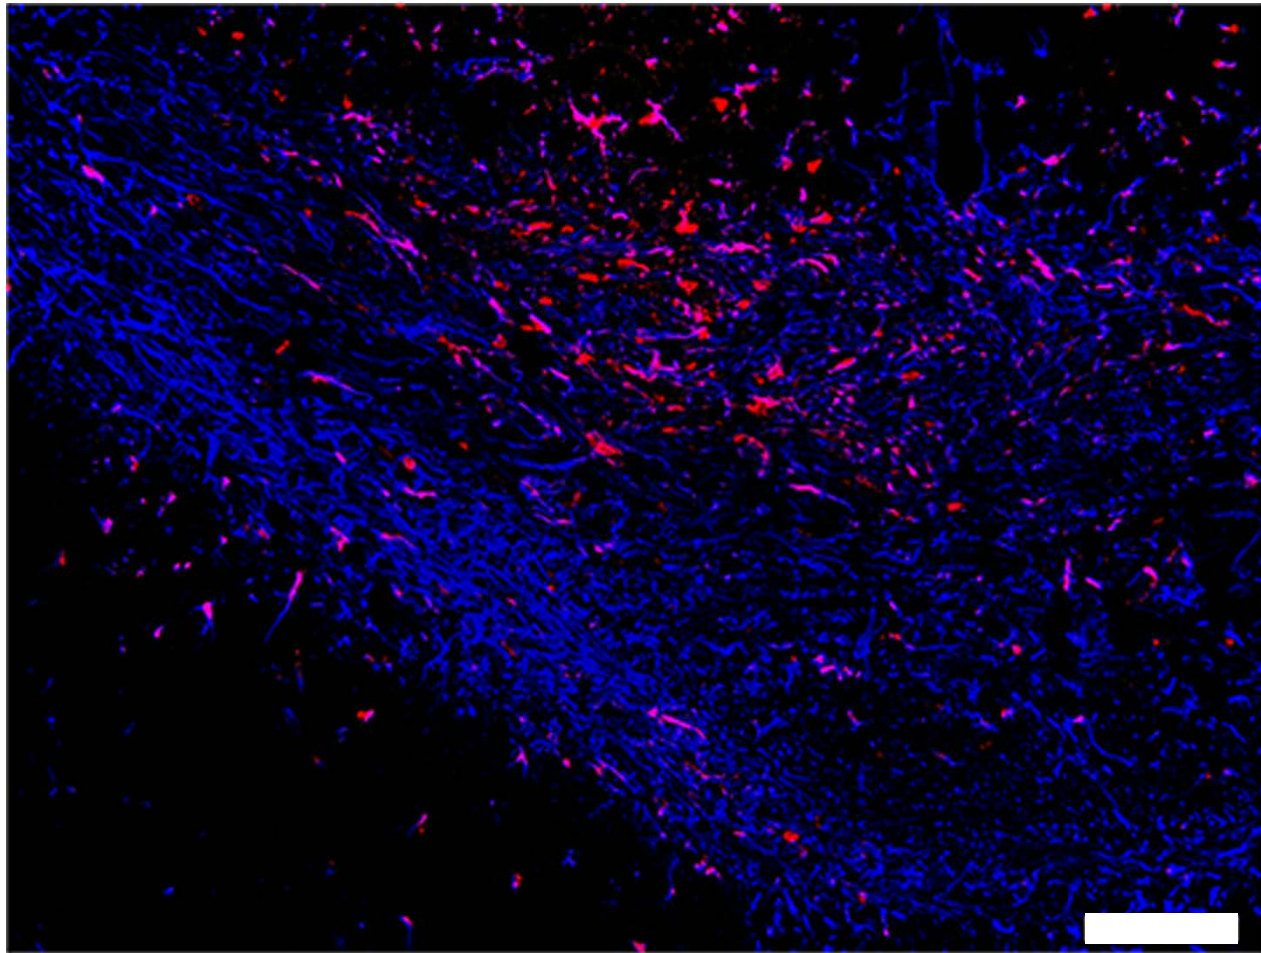

# CX<sub>3</sub>CR1<sup>-/-</sup> - TOPRO3

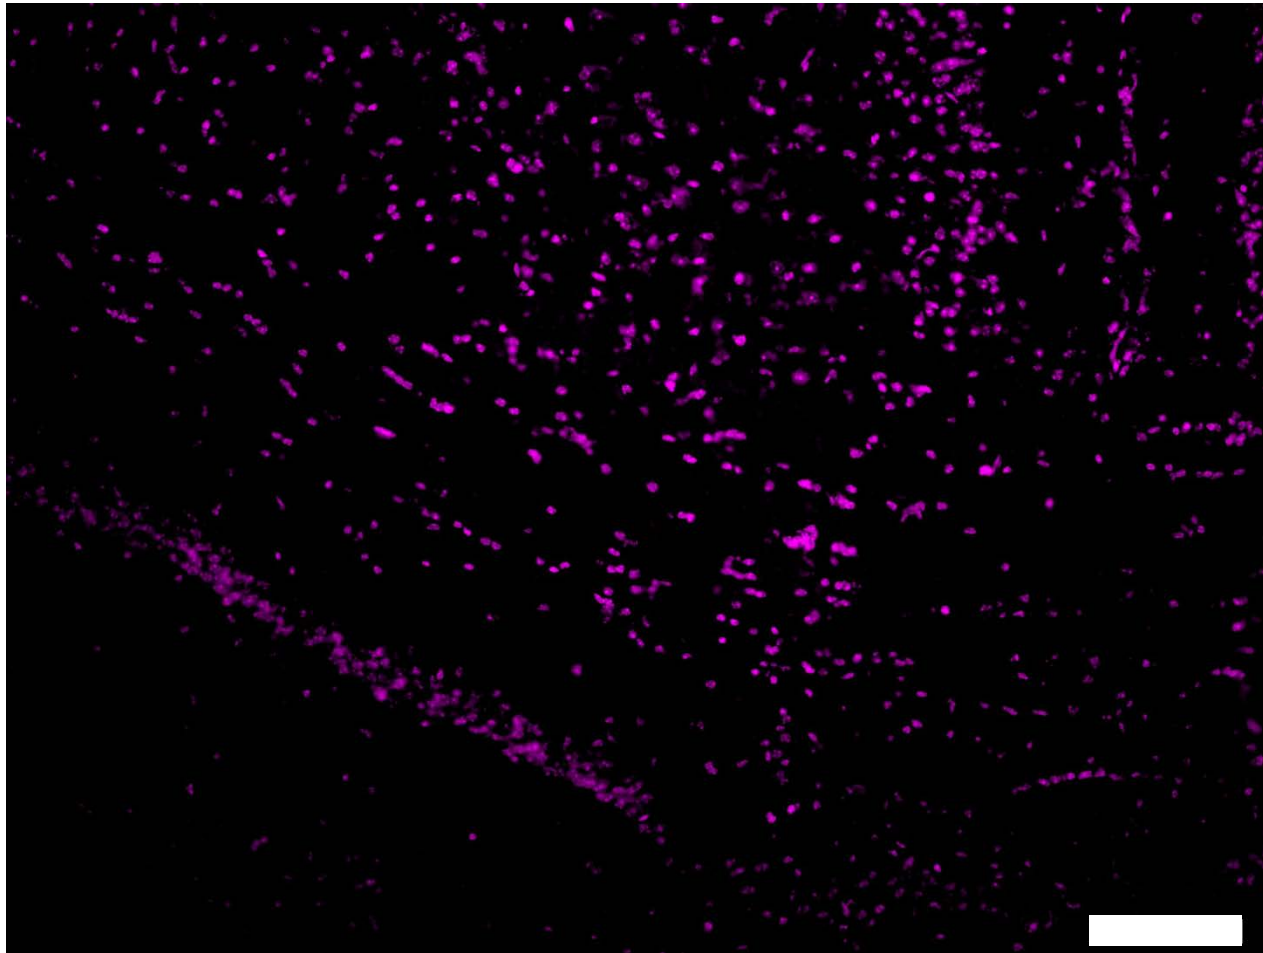

CX<sub>3</sub>CR1<sup>-/-</sup> - IBA1/CC1

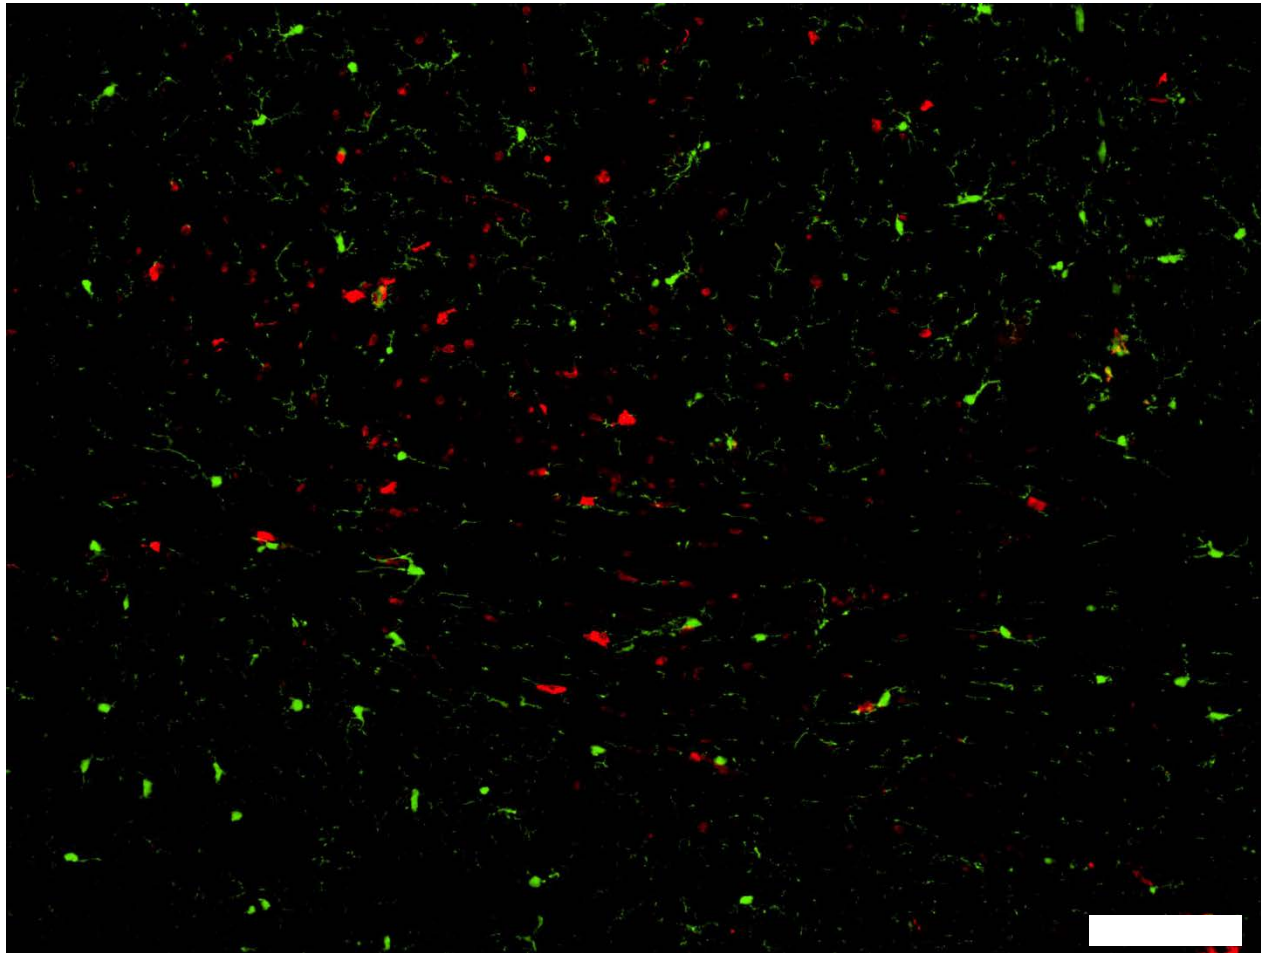

CX<sub>3</sub>CR1<sup>-/-</sup> - MBP

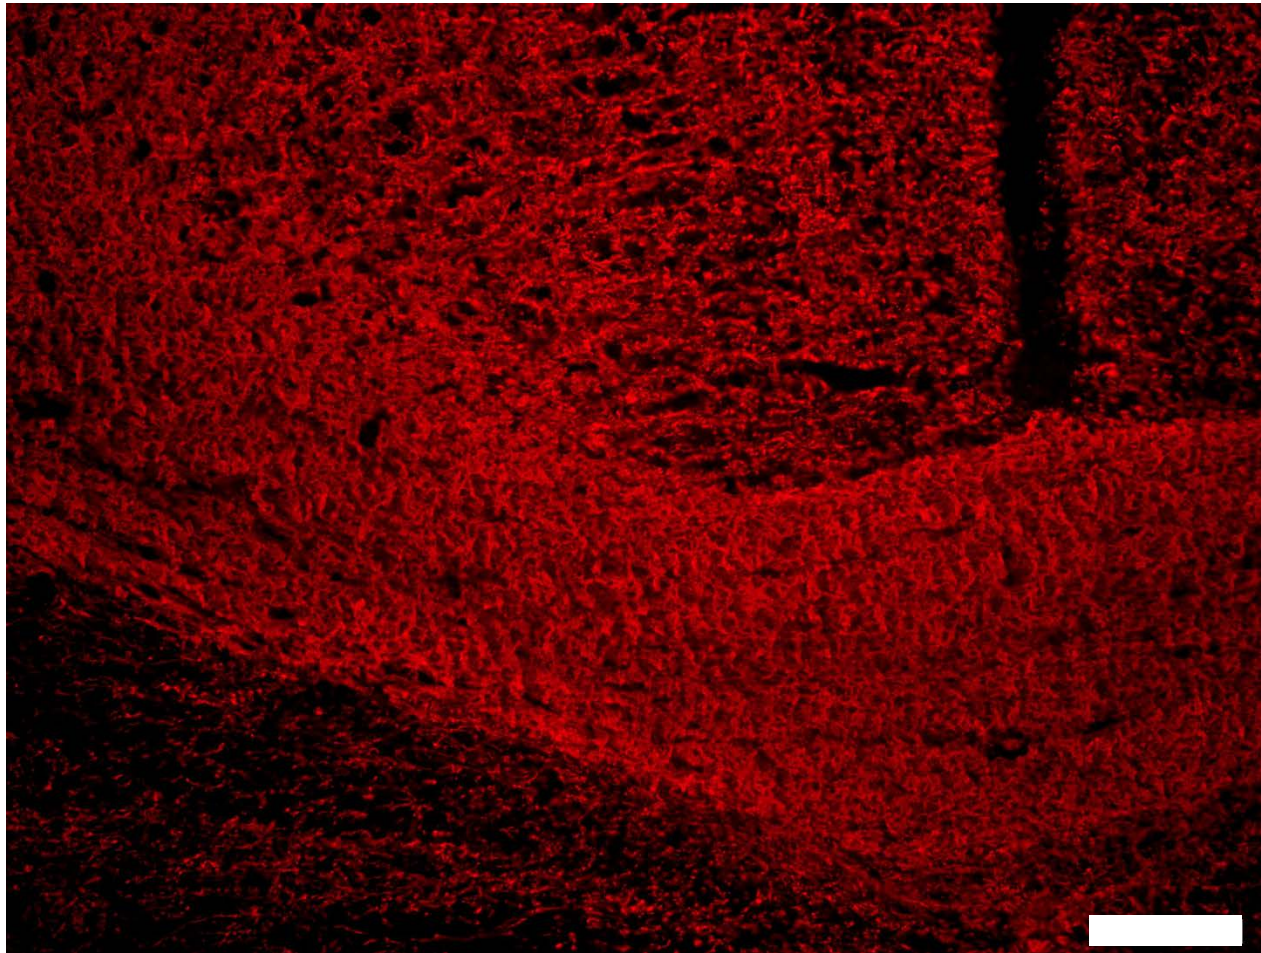

CX<sub>3</sub>CR1<sup>-/-</sup> - S100β/GFAP

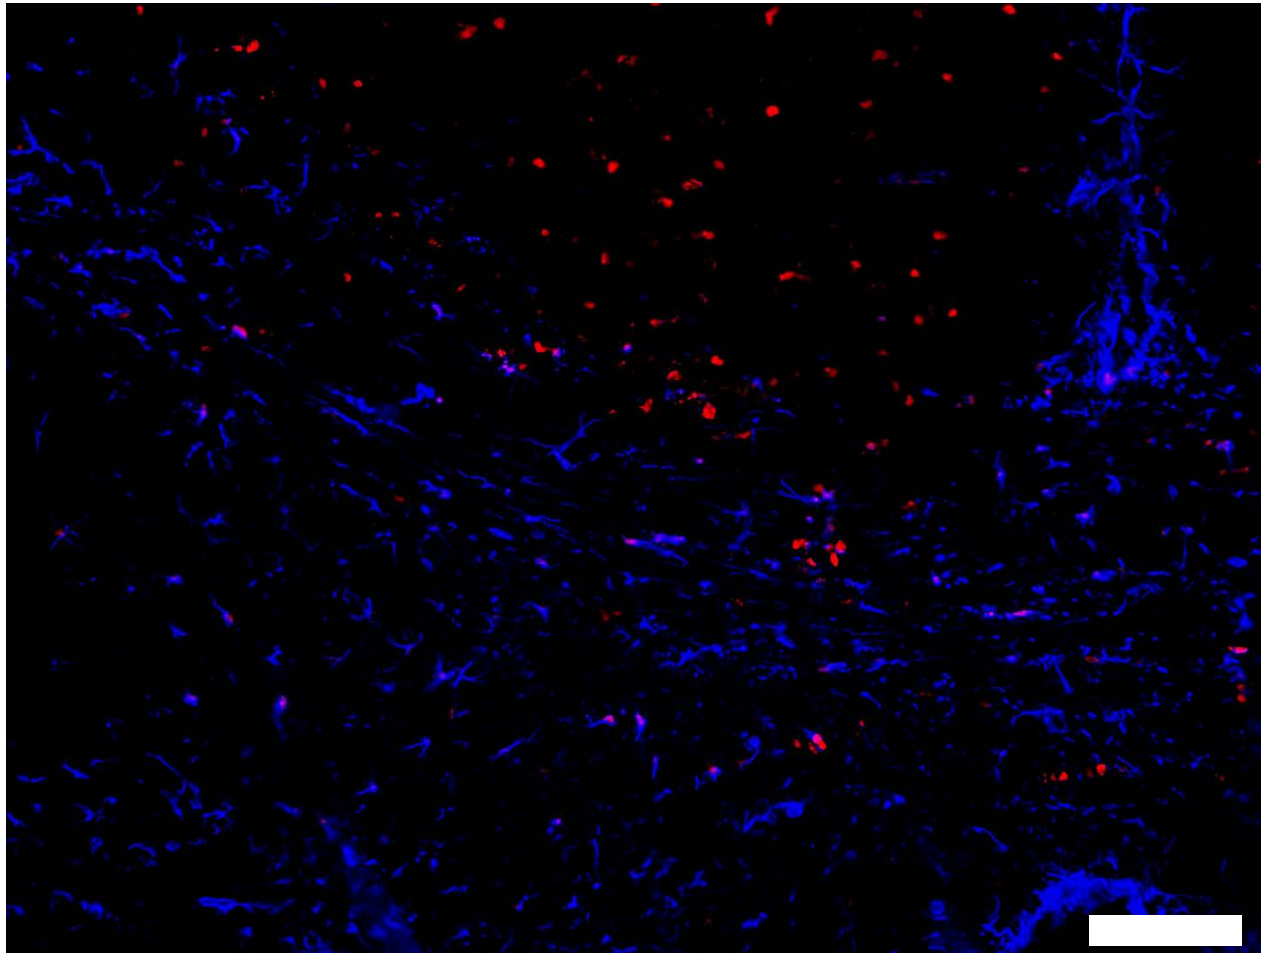

# CPZ CX<sub>3</sub>CR1<sup>-/-</sup> - TOPRO3

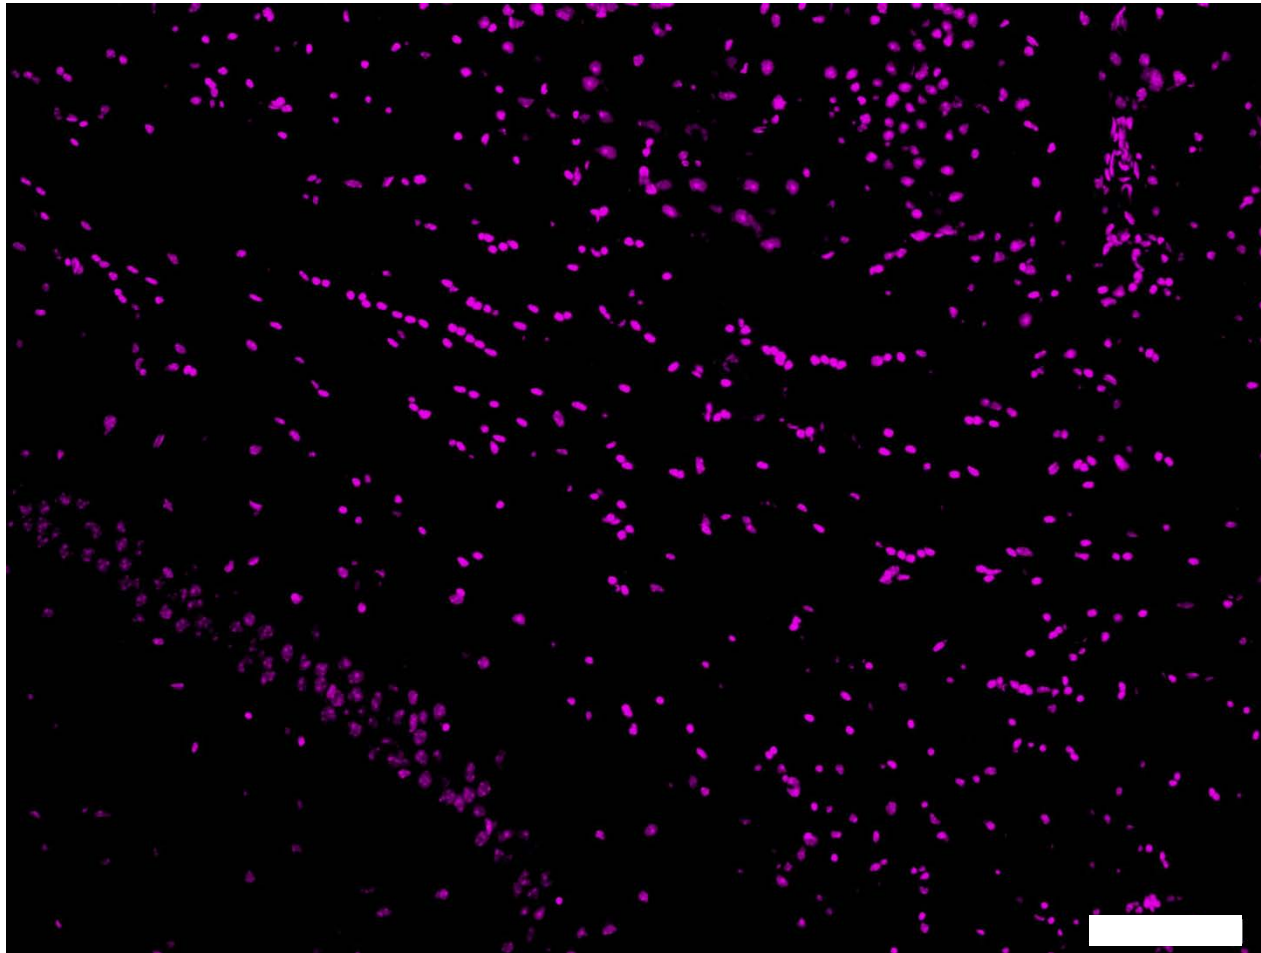

CPZ CX<sub>3</sub>CR1<sup>-/-</sup> - IBA1/CC1

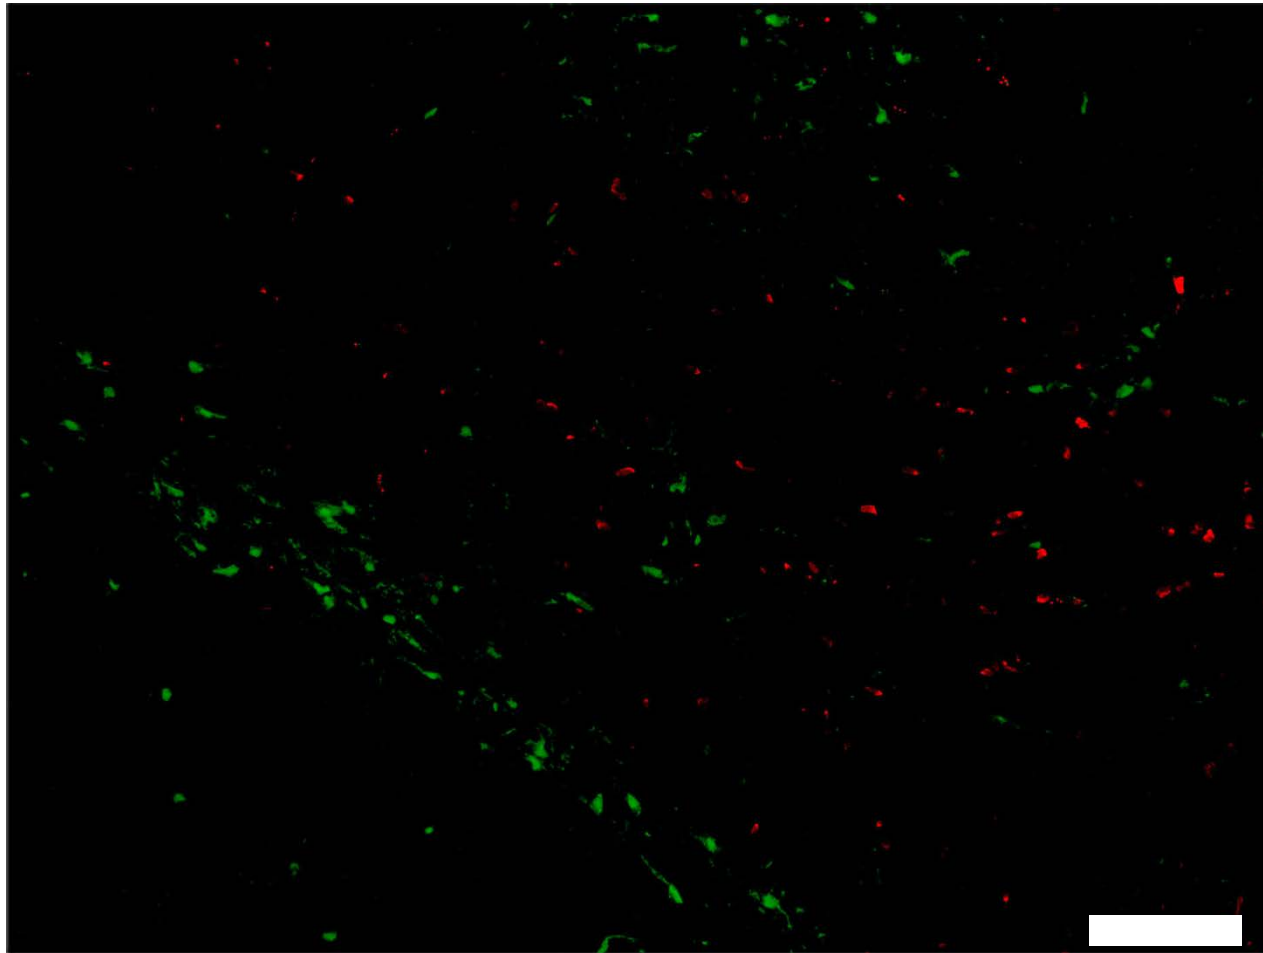

CPZ CX<sub>3</sub>CR1<sup>-/-</sup> - MBP

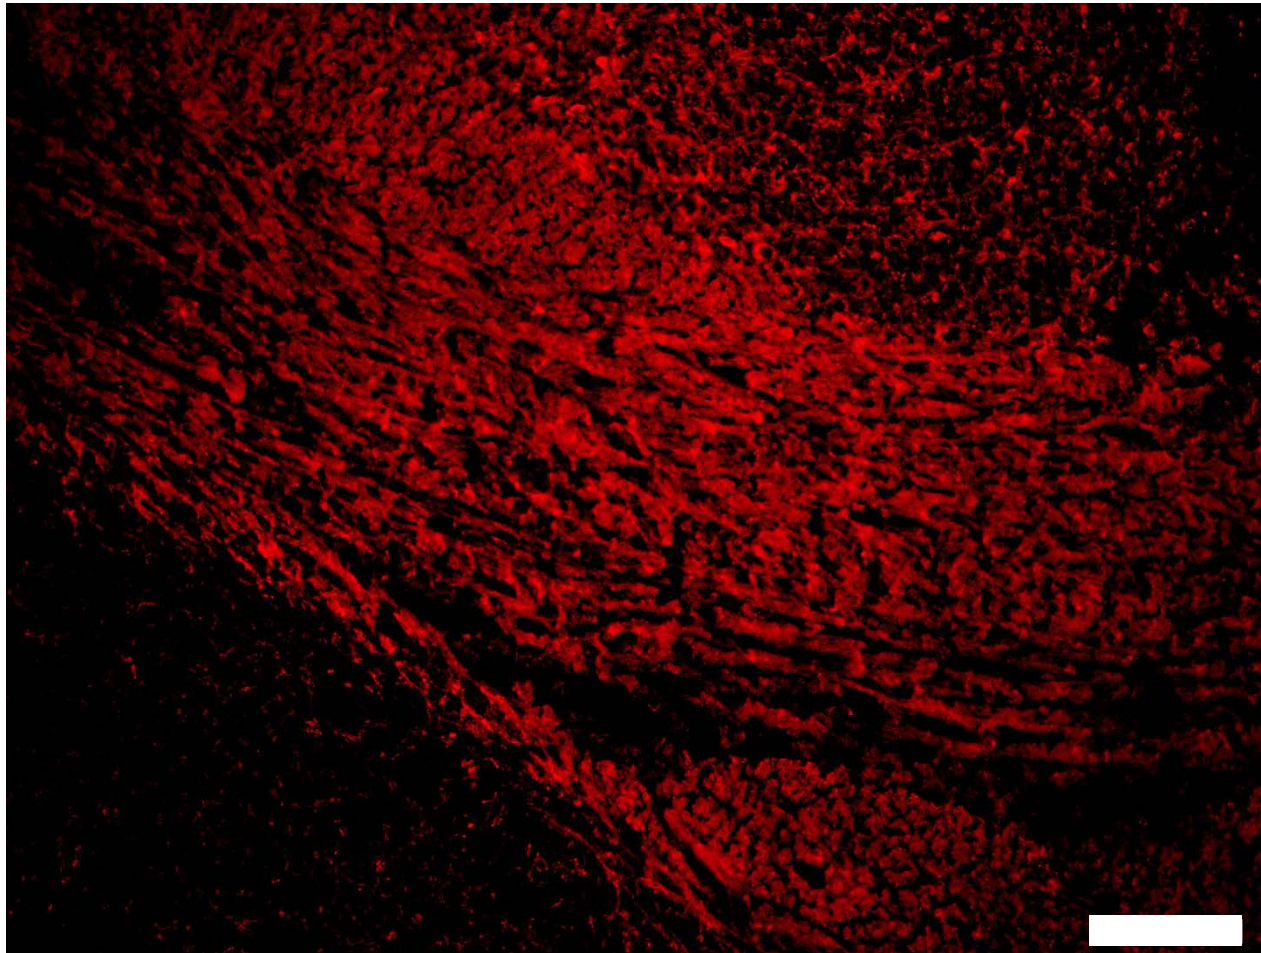



CPZ CX<sub>3</sub>CR1<sup>-/-</sup> - S100 $\beta$ /GFAP

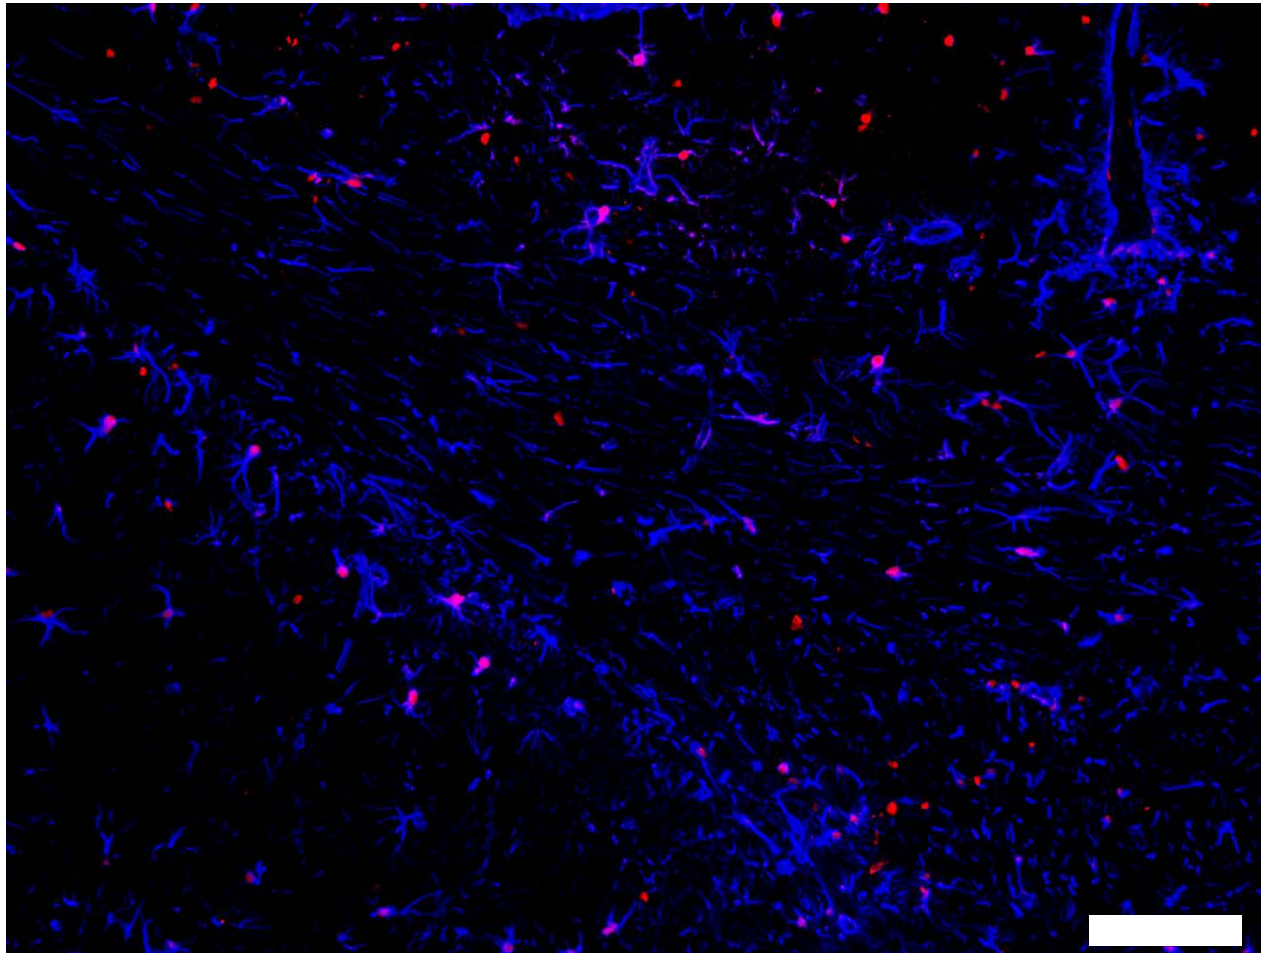

Supplement: nbm0028-0505-sd3.pdf [file nbm0028-0505-sd3.pdf]
