# Supplementary material for: Cuprizone-induced demyelination and demyelination-associated inflammation result in different proton magnetic resonance metabolite spectra
Source: PubMed Central journal article supplement — NMR Biomed. 2015 Mar 19;28(4):505–13. doi: 10.1002/nbm.3277 (PMC4403969; doi:10.1002/nbm.3277), 2015-03-19
Supplement: nbm0028-0505-sd1.pdf [file nbm0028-0505-sd1.pdf]

# Supplementary file S1

Original and Bonferroni corrected  
p-values.

## Histology - Original P values.

| <b>NUCLEI</b>    | <b>Wt Healthy</b> | <b>Wt Cuprizone</b> | <b>-/+ Healthy</b> | <b>-/+ Cuprizone</b> | <b>-/- Healthy</b> | <b>-/- Cuprizone</b> |
|------------------|-------------------|---------------------|--------------------|----------------------|--------------------|----------------------|
| Wt Healthy       |                   | < 0.0001            | 0.0328             | < 0.0001             | 0.0063             | 0.0153               |
| Wt Cuprizone     | < 0.0001          |                     | < 0.0001           | 0.7049               | < 0.0001           | < 0.0001             |
| -/+ Healthy      | 0.0328            | < 0.0001            |                    | < 0.0001             | 0.5885             | 0.3664               |
| -/+ Cuprizone    | < 0.0001          | 0.7049              | < 0.0001           |                      | < 0.0001           | < 0.0001             |
| -/- Healthy      | 0.0063            | < 0.0001            | 0.5885             | < 0.0001             |                    | 0.5314               |
| -/- Cuprizone    | 0.0153            | < 0.0001            | 0.3664             | < 0.0001             | 0.5314             |                      |
| <b>MICROGLIA</b> | <b>Wt Healthy</b> | <b>Wt Cuprizone</b> | <b>-/+ Healthy</b> | <b>-/+ Cuprizone</b> | <b>-/- Healthy</b> | <b>-/- Cuprizone</b> |
| Wt Healthy       |                   | < 0.0001            | 0.2002             | < 0.0001             | 0.1389             | 0.3289               |
| Wt Cuprizone     | < 0.0001          |                     | < 0.0001           | 0.6503               | < 0.0001           | < 0.0001             |
| -/+ Healthy      | 0.2002            | < 0.0001            |                    | < 0.0001             | 0.7474             | 0.0222               |
| -/+ Cuprizone    | < 0.0001          | 0.6503              | < 0.0001           |                      | < 0.0001           | < 0.0001             |
| -/- Healthy      | 0.1389            | < 0.0001            | 0.7474             | < 0.0001             |                    | 0.0132               |
| -/- Cuprizone    | 0.3289            | < 0.0001            | 0.0222             | < 0.0001             | 0.0132             |                      |
| <b>CC1</b>       | <b>Wt Healthy</b> | <b>Wt Cuprizone</b> | <b>-/+ Healthy</b> | <b>-/+ Cuprizone</b> | <b>-/- Healthy</b> | <b>-/- Cuprizone</b> |
| Wt Healthy       |                   | < 0.0001            | 0.0848             | < 0.0001             | < 0.0001           | < 0.0001             |
| Wt Cuprizone     | < 0.0001          |                     | < 0.0001           | 0.4661               | < 0.0001           | < 0.0001             |
| -/+ Healthy      | 0.0848            | < 0.0001            |                    | < 0.0001             | 0.5257             | 0.0483               |
| -/+ Cuprizone    | < 0.0001          | 0.4661              | < 0.0001           |                      | < 0.0001           | 0.0004               |
| -/- Healthy      | < 0.0001          | < 0.0001            | 0.5257             | < 0.0001             |                    | 0.0529               |
| -/- Cuprizone    | < 0.0001          | < 0.0001            | 0.0483             | 0.0004               | 0.0529             |                      |
| <b>MBP</b>       | <b>Wt Healthy</b> | <b>Wt Cuprizone</b> | <b>-/+ Healthy</b> | <b>-/+ Cuprizone</b> | <b>-/- Healthy</b> | <b>-/- Cuprizone</b> |
| Wt Healthy       |                   | < 0.0001            | 0.0316             | < 0.0001             | < 0.0001           | < 0.0001             |
| Wt Cuprizone     | < 0.0001          |                     | < 0.0001           | 0.0703               | < 0.0001           | < 0.0001             |
| -/+ Healthy      | 0.0316            | < 0.0001            |                    | < 0.0001             | 0.0013             | < 0.0001             |
| -/+ Cuprizone    | < 0.0001          | 0.0703              | < 0.0001           |                      | < 0.0001           | < 0.0001             |
| -/- Healthy      | < 0.0001          | < 0.0001            | 0.0013             | < 0.0001             |                    | < 0.0001             |
| -/- Cuprizone    | < 0.0001          | < 0.0001            | < 0.0001           | < 0.0001             | < 0.0001           |                      |
| <b>S100β</b>     | <b>Wt Healthy</b> | <b>Wt Cuprizone</b> | <b>-/+ Healthy</b> | <b>-/+ Cuprizone</b> | <b>-/- Healthy</b> | <b>-/- Cuprizone</b> |
| Wt Healthy       |                   | 0.0018              | 0.2979             | 0.0001               | 0.3514             | 0.0374               |
| Wt Cuprizone     | 0.0018            |                     | 0.0123             | 0.3826               | 0.0010             | 0.0085               |
| -/+ Healthy      | 0.2979            | 0.0123              |                    | 0.0011               | 0.1380             | 0.9494               |
| -/+ Cuprizone    | 0.0001            | 0.3826              | 0.0011             |                      | < 0.0001           | 0.0007               |
| -/- Healthy      | 0.3514            | 0.0010              | 0.1380             | < 0.0001             |                    | 0.0425               |
| -/- Cuprizone    | 0.0370            | 0.0085              | 0.9494             | 0.0007               | 0.0425             |                      |
| <b>GFAP</b>      | <b>Wt Healthy</b> | <b>Wt Cuprizone</b> | <b>-/+ Healthy</b> | <b>-/+ Cuprizone</b> | <b>-/- Healthy</b> | <b>-/- Cuprizone</b> |
| Wt Healthy       |                   | < 0.0001            | 0.0101             | < 0.0001             | 0.3242             | 0.1070               |
| Wt Cuprizone     | < 0.0001          |                     | < 0.0001           | 0.0760               | < 0.0001           | < 0.0001             |
| -/+ Healthy      | 0.0101            | < 0.0001            |                    | < 0.0001             | 0.1805             | 0.0003               |
| -/+ Cuprizone    | < 0.0001          | 0.0760              | < 0.0001           |                      | < 0.0001           | < 0.0001             |
| -/- Healthy      | 0.3242            | < 0.0001            | 0.1805             | < 0.0001             |                    | 0.0208               |
| -/- Cuprizone    | 0.1070            | < 0.0001            | 0.0003             | < 0.0001             | 0.0208             |                      |

## Histology - P values following Bonferroni correction.

| <b>NUCLEI</b>    | <b>Wt Healthy</b> | <b>Wt Cuprizone</b> | <b>-/+ Healthy</b> | <b>-/+ Cuprizone</b> | <b>-/- Healthy</b> | <b>-/- Cuprizone</b> |
|------------------|-------------------|---------------------|--------------------|----------------------|--------------------|----------------------|
| Wt Healthy       |                   | < 0.0001            | 0.4917             | 0.0002               | 0.0948             | 0.2287               |
| Wt Cuprizone     | < 0.0001          |                     | < 0.0001           | 1.0000               | < 0.0001           | < 0.0001             |
| -/+ Healthy      | 0.4917            | < 0.0001            |                    | < 0.0001             | 1.0000             | 1.0000               |
| -/+ Cuprizone    | 0.0002            | 1.0000              | < 0.0001           |                      | < 0.0001           | < 0.0001             |
| -/- Healthy      | 0.0948            | < 0.0001            | 1.0000             | < 0.0001             |                    | 1.0000               |
| -/- Cuprizone    | 0.2287            | < 0.0001            | 1.0000             | < 0.0001             | 1.0000             |                      |
| <b>MICROGLIA</b> | <b>Wt Healthy</b> | <b>Wt Cuprizone</b> | <b>-/+ Healthy</b> | <b>-/+ Cuprizone</b> | <b>-/- Healthy</b> | <b>-/- Cuprizone</b> |
| Wt Healthy       |                   | < 0.0001            | 1.0000             | < 0.0001             | 1.0000             | 1.0000               |
| Wt Cuprizone     | < 0.0001          |                     | < 0.0001           | 1.0000               | < 0.0001           | < 0.0001             |
| -/+ Healthy      | 1.0000            | < 0.0001            |                    | < 0.0001             | 1.0000             | 0.3332               |
| -/+ Cuprizone    | < 0.0001          | 1.0000              | < 0.0001           |                      | < 0.0001           | < 0.0001             |
| -/- Healthy      | 1.0000            | < 0.0001            | 1.0000             | < 0.0001             |                    | 0.1974               |
| -/- Cuprizone    | 1.0000            | < 0.0001            | 0.3332             | < 0.0001             | 0.1974             |                      |
| <b>CC1</b>       | <b>Wt Healthy</b> | <b>Wt Cuprizone</b> | <b>-/+ Healthy</b> | <b>-/+ Cuprizone</b> | <b>-/- Healthy</b> | <b>-/- Cuprizone</b> |
| Wt Healthy       |                   | < 0.0001            | 1.0000             | < 0.0001             | 0.0005             | 0.0010               |
| Wt Cuprizone     | < 0.0001          |                     | < 0.0001           | 1.0000               | < 0.0001           | 0.0002               |
| -/+ Healthy      | 1.0000            | < 0.0001            |                    | < 0.0001             | 1.0000             | 0.7250               |
| -/+ Cuprizone    | < 0.0001          | 1.0000              | < 0.0001           |                      | < 0.0001           | 0.0066               |
| -/- Healthy      | 0.0005            | < 0.0001            | 1.0000             | < 0.0001             |                    | 0.7939               |
| -/- Cuprizone    | 0.0010            | 0.0002              | 0.7250             | 0.0066               | 0.7939             |                      |
| <b>MBP</b>       | <b>Wt Healthy</b> | <b>Wt Cuprizone</b> | <b>-/+ Healthy</b> | <b>-/+ Cuprizone</b> | <b>-/- Healthy</b> | <b>-/- Cuprizone</b> |
| Wt Healthy       |                   | < 0.0001            | 0.4738             | < 0.0001             | 0.0003             | < 0.0001             |
| Wt Cuprizone     | < 0.0001          |                     | < 0.0001           | 1.0000               | < 0.0001           | < 0.0001             |
| -/+ Healthy      | 0.4738            | < 0.0001            |                    | < 0.0001             | 0.0199             | < 0.0001             |
| -/+ Cuprizone    | < 0.0001          | 1.0000              | < 0.0001           |                      | < 0.0001           | < 0.0001             |
| -/- Healthy      | 0.0003            | < 0.0001            | 0.0199             | < 0.0001             |                    | < 0.0001             |
| -/- Cuprizone    | < 0.0001          | < 0.0001            | < 0.0001           | < 0.0001             | < 0.0001           |                      |
| <b>S100β</b>     | <b>Wt Healthy</b> | <b>Wt Cuprizone</b> | <b>-/+ Healthy</b> | <b>-/+ Cuprizone</b> | <b>-/- Healthy</b> | <b>-/- Cuprizone</b> |
| Wt Healthy       |                   | 0.0270              | 1.0000             | 0.0020               | 1.0000             | 0.5613               |
| Wt Cuprizone     | 0.0270            |                     | 0.1844             | 1.0000               | 0.0145             | 0.1271               |
| -/+ Healthy      | 1.0000            | 0.1844              |                    | 0.0159               | 1.0000             | 1.0000               |
| -/+ Cuprizone    | 0.0020            | 1.0000              | 0.0159             |                      | 0.0011             | 0.0100               |
| -/- Healthy      | 1.0000            | 0.0145              | 1.0000             | 0.0011               |                    | 0.6375               |
| -/- Cuprizone    | 0.5613            | 0.1271              | 1.0000             | 0.0100               | 0.6375             |                      |
| <b>GFAP</b>      | <b>Wt Healthy</b> | <b>Wt Cuprizone</b> | <b>-/+ Healthy</b> | <b>-/+ Cuprizone</b> | <b>-/- Healthy</b> | <b>-/- Cuprizone</b> |
| Wt Healthy       |                   | < 0.0001            | 0.1509             | < 0.0001             | 1.0000             | 1.0000               |
| Wt Cuprizone     | < 0.0001          |                     | < 0.0001           | 1.0000               | < 0.0001           | < 0.0001             |
| -/+ Healthy      | 0.1509            | < 0.0001            |                    | < 0.0001             | 1.0000             | 0.0039               |
| -/+ Cuprizone    | < 0.0001          | 1.0000              | < 0.0001           |                      | < 0.0001           | < 0.0001             |
| -/- Healthy      | 1.0000            | < 0.0001            | 1.0000             | < 0.0001             |                    | 0.3112               |
| -/- Cuprizone    | 1.0000            | < 0.0001            | 0.0039             | < 0.0001             | 0.3112             |                      |

**<sup>1</sup>H-MRS - Original P values (Healthy vs CPZ).**

|                                        | Glu    | Gln    | GSH    | Ins    | NAA     | Tau     | tCho    | tNAA    | tCr    |
|----------------------------------------|--------|--------|--------|--------|---------|---------|---------|---------|--------|
| <b>CX<sub>3</sub>CR1<sup>+/+</sup></b> | 0,0218 | 0,1995 | 0,8581 | 0,1374 | <0.0001 | <0.0001 | 0,0002  | <0.0001 | 0,1898 |
| <b>CX<sub>3</sub>CR1<sup>-/-</sup></b> | 0,0894 | 0,8938 | 0,2790 | 0,0561 | 0,0883  | 0,3426  | <0.0001 | 0,0011  | 0,5433 |

**<sup>1</sup>H-MRS - P values following Bonferroni correction (Healthy vs CPZ).**

|                                        | Glu    | Gln    | GSH    | Ins    | NAA    | Tau     | tCho    | tNAA    | tCr    |
|----------------------------------------|--------|--------|--------|--------|--------|---------|---------|---------|--------|
| <b>CX<sub>3</sub>CR1<sup>+/+</sup></b> | 0,0437 | 0,3990 | 1,0000 | 0,2749 | 0,0001 | <0.0001 | 0,0005  | <0.0001 | 0,3796 |
| <b>CX<sub>3</sub>CR1<sup>-/-</sup></b> | 0,1788 | 1,0000 | 0,5580 | 0,1122 | 0,1765 | 0,6851  | <0.0001 | 0,0022  | 1,0000 |
