# Supplementary material for: Cuprizone-induced demyelination and demyelination-associated inflammation result in different proton magnetic resonance metabolite spectra
Source: PubMed Central journal article supplement — NMR Biomed. 2015 Mar 19;28(4):505–13. doi: 10.1002/nbm.3277 (PMC4403969; doi:10.1002/nbm.3277), 2015-03-19
Supplement: nbm0028-0505-sd2.pdf [file nbm0028-0505-sd2.pdf]

# Supplementary file S2

Anatomical location of collected slides and pictures taken, as well as the placement of the  $^1\text{H}$ -MRS voxel of interest.

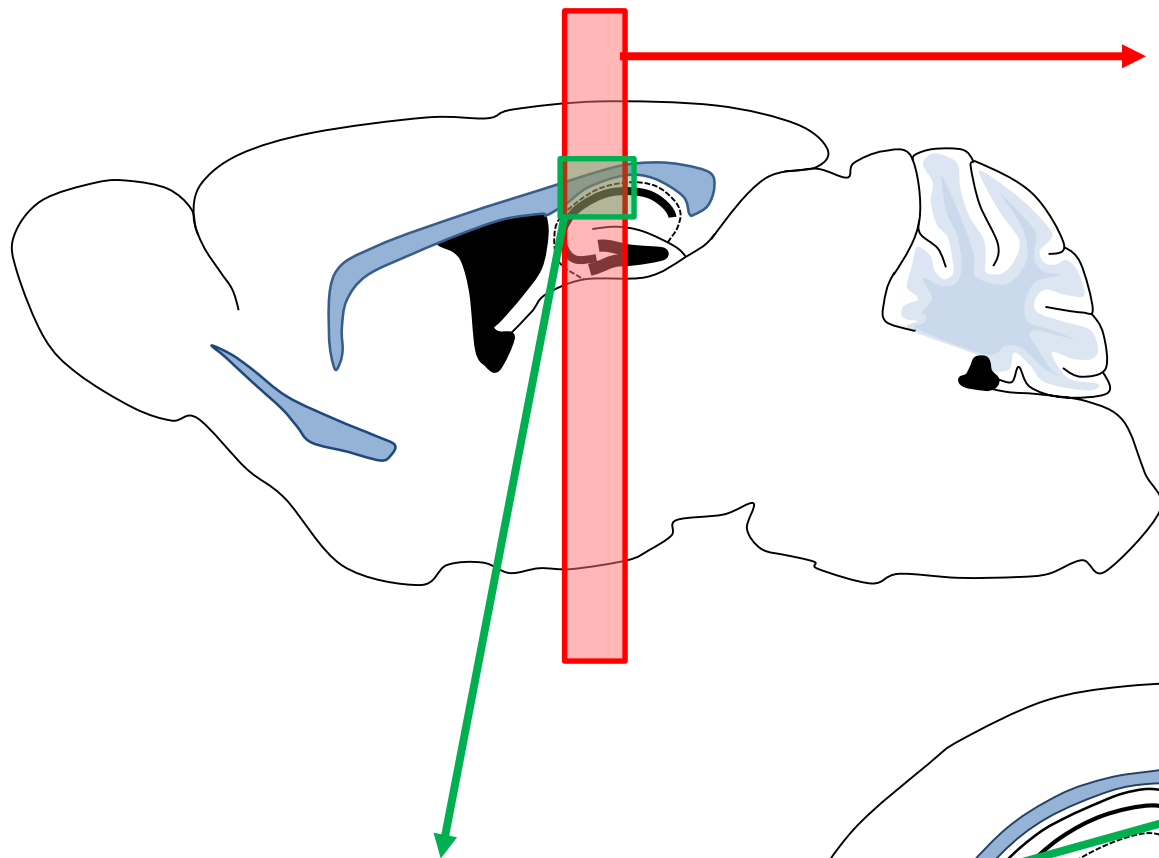

Histological slides were collected at the level of the splenium. Two pictures covering the corpus callosum were taken per slide.

Placement of the <sup>1</sup>H-MRS voxel of interest was done such that it corresponded to histological region of interest.

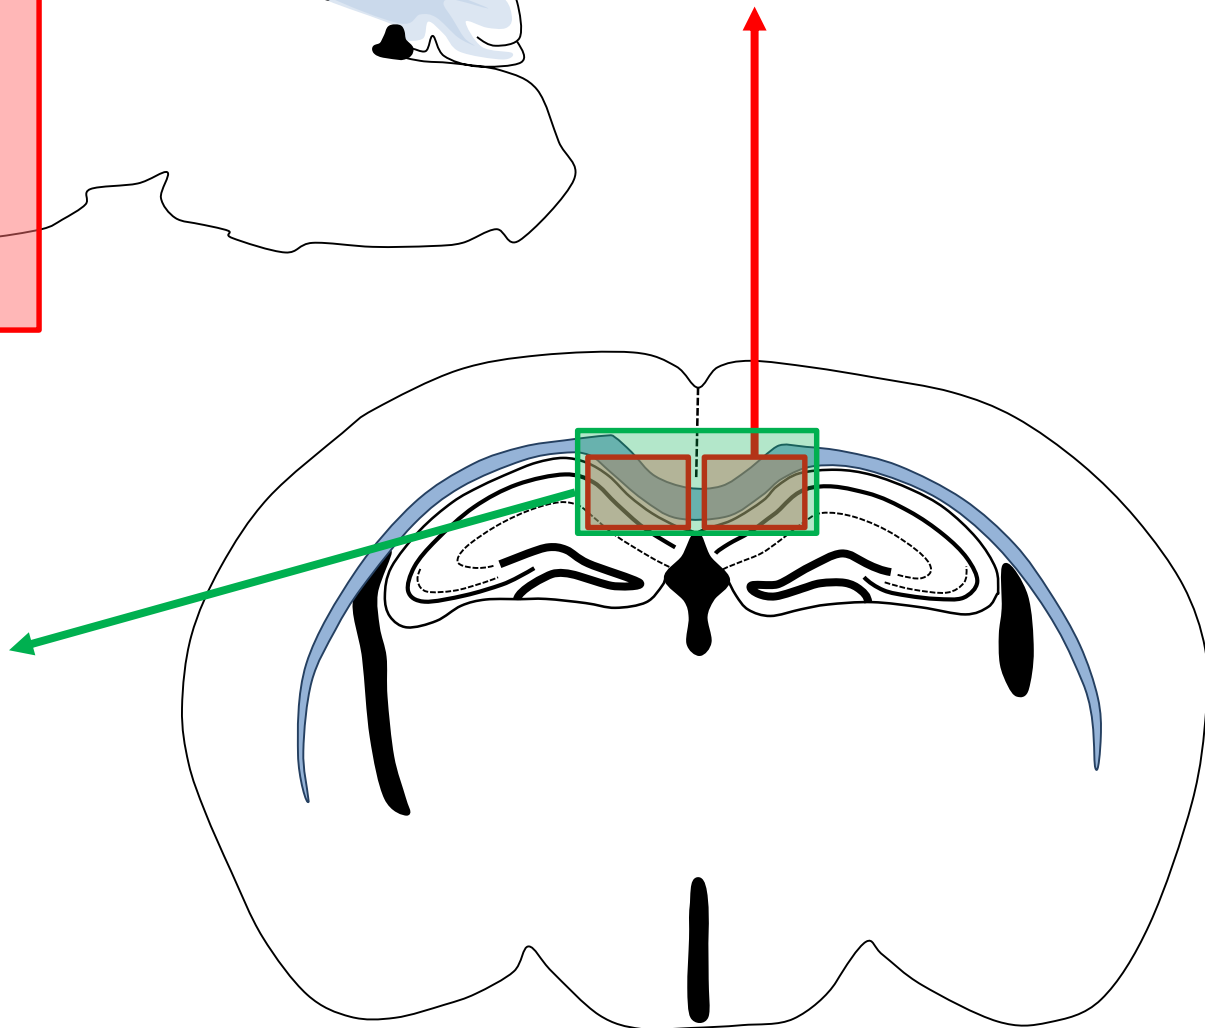

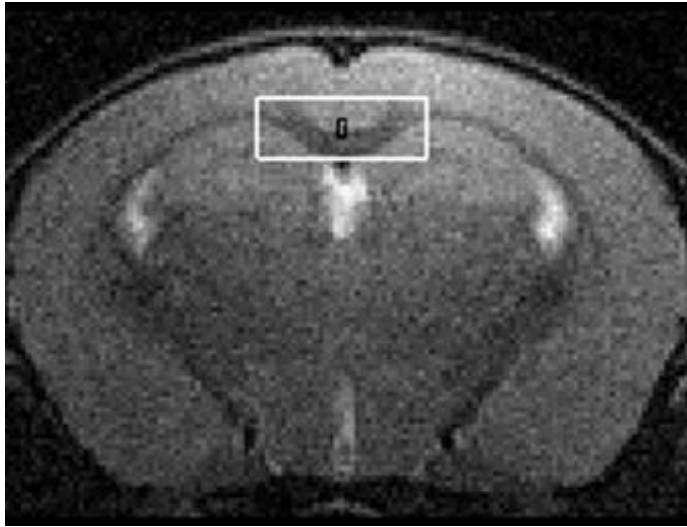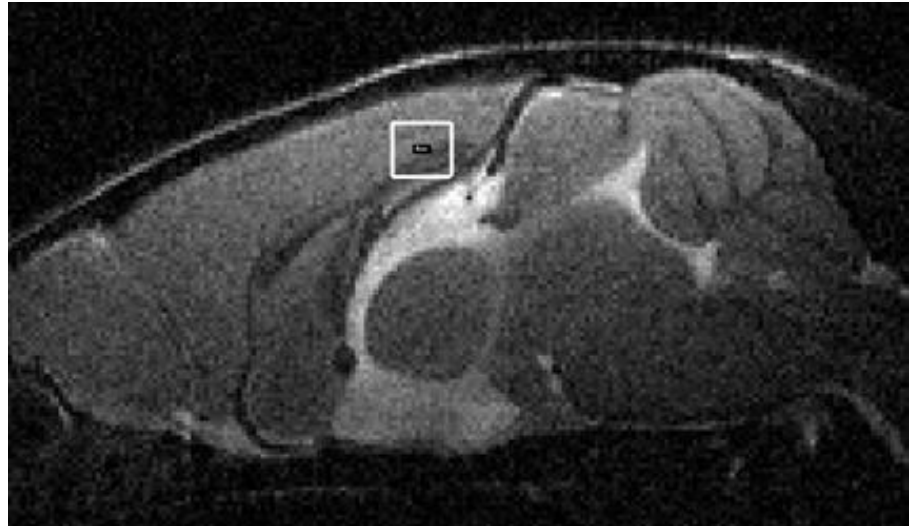

Axial (left) and sagittal (right) T2 RARE images of a mouse brain showing the exact anatomical placement of the VOI (white square) for <sup>1</sup>H-MRS.
